# Supplementary material for: 16S rRNA Gene-Based Metagenomic Analysis of Ozark Cave Bacteria
Source: PubMed Central journal article supplement (PMC5856467; doi:10.3390/d9030031), 2017-08-15
Supplement: NIHMS943117-supplement-Supplemental_Table1.pdf [file NIHMS943117-supplement-Supplemental_Table1.pdf]

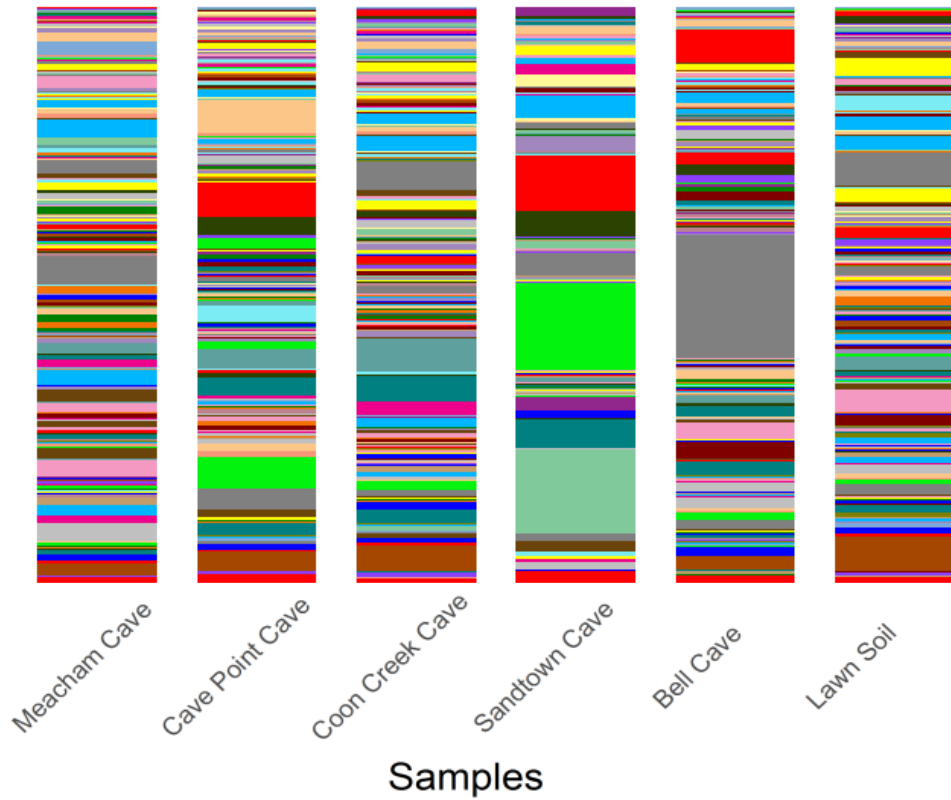

| Legend | Taxonomy                                                                                                             | Total | MGPLP1<br>3 | MGPLP1<br>4 | MGPLP1<br>7 | MGPLP1<br>8 | MGPLP2<br>0 | MGPLP2<br>1 |
|--------|----------------------------------------------------------------------------------------------------------------------|-------|-------------|-------------|-------------|-------------|-------------|-------------|
|        |                                                                                                                      | %     | %           | %           | %           | %           | %           | %           |
|        | Unassigned;Other;Other;Other;Other;Other                                                                             | 1.3%  | 1.0%        | 1.4%        | 0.9%        | 2.2%        | 1.4%        | 1.1%        |
|        | k__Archaea;p__Crenarchaeota;c__MBGA;o__NRP-J;f__g__                                                                  | 0.0%  | 0.0%        | 0.0%        | 0.0%        | 0.0%        | 0.0%        | 0.0%        |
|        | k__Archaea;p__Crenarchaeota;c__MCG;o__pGrFC26;f__g__                                                                 | 0.0%  | 0.0%        | 0.0%        | 0.0%        | 0.0%        | 0.0%        | 0.0%        |
|        | k__Archaea;p__Crenarchaeota;c__Thaumarchaeota;o__AK31;f__g__                                                         | 0.0%  | 0.0%        | 0.0%        | 0.0%        | 0.0%        | 0.0%        | 0.0%        |
|        | k__Archaea;p__Crenarchaeota;c__Thaumarchaeota;o__Cenarchaeales;f__SAGMA-X;g__                                        | 0.0%  | 0.0%        | 0.0%        | 0.0%        | 0.0%        | 0.0%        | 0.0%        |
|        | k__Archaea;p__Crenarchaeota;c__Thaumarchaeota;o__Nitrososphaerales;f__Nitrososphaeraeae;g__Candidatus Nitrososphaera | 0.0%  | 0.0%        | 0.0%        | 0.0%        | 0.0%        | 0.0%        | 0.0%        |
|        | k__Archaea;p__Crenarchaeota;c__Thermoprotei;o__f__g__                                                                | 0.0%  | 0.0%        | 0.0%        | 0.0%        | 0.0%        | 0.0%        | 0.0%        |
|        | k__Archaea;p__Euryarchaeota;c__Methanobacteria;o__Methanobacteriales;f__Methanobacteriaceae;g__Methanobacterium      | 0.0%  | 0.0%        | 0.0%        | 0.0%        | 0.0%        | 0.0%        | 0.0%        |
|        | k__Archaea;p__Euryarchaeota;c__Methanomicrobia;o__Methanocellales;f__Methanocellaceae;g__Methanocella                | 0.0%  | 0.0%        | 0.0%        | 0.0%        | 0.0%        | 0.0%        | 0.0%        |
|        | k__Archaea;p__Euryarchaeota;c__Methanomicrobia;o__Methanosarcinales;f__Methanosarcinaceae;g__Methanosarcina          | 0.0%  | 0.0%        | 0.0%        | 0.0%        | 0.0%        | 0.0%        | 0.0%        |
|        | k__Archaea;p__Euryarchaeota;c__Methanomicrobia;o__YC-E6;f__g__                                                       | 0.0%  | 0.0%        | 0.0%        | 0.0%        | 0.0%        | 0.0%        | 0.0%        |
|        | k__Archaea;p__Euryarchaeota;c__Thermoplasmata;o__E2;f__g__                                                           | 0.0%  | 0.0%        | 0.0%        | 0.0%        | 0.0%        | 0.0%        | 0.0%        |
|        | k__Archaea;p__Euryarchaeota;c__Thermoplasmata;o__E2;f__[Methanomassiliococcaceae];g__                                | 0.0%  | 0.0%        | 0.0%        | 0.0%        | 0.2%        | 0.0%        | 0.0%        |
|        | k__Archaea;p__[Parvarchaeota];c__[Micrarchaea];o__[Micrarchaeales];f__g__                                            | 0.0%  | 0.0%        | 0.0%        | 0.0%        | 0.0%        | 0.0%        | 0.0%        |
|        | k__Archaea;p__[Parvarchaeota];c__[Parvarchaea];o__WCHD3-30;f__g__                                                    | 0.0%  | 0.0%        | 0.0%        | 0.0%        | 0.0%        | 0.0%        | 0.0%        |
|        | k__Archaea;p__[Parvarchaeota];c__[Parvarchaea];o__YLA114;f__g__                                                      | 0.0%  | 0.0%        | 0.0%        | 0.0%        | 0.0%        | 0.0%        | 0.0%        |
|        | k__Bacteria;Other;Other;Other;Other;Other                                                                            | 0.0%  | 0.0%        | 0.0%        | 0.0%        | 0.0%        | 0.0%        | 0.0%        |
|        | k__Bacteria;p__c__o__f__g__                                                                                          | 0.0%  | 0.0%        | 0.0%        | 0.0%        | 0.0%        | 0.0%        | 0.0%        |
|        | k__Bacteria;p__AD3;c__ABS-6;o__f__g__                                                                                | 0.2%  | 0.0%        | 0.0%        | 0.1%        | 1.3%        | 0.0%        | 0.0%        |
|        | k__Bacteria;p__AD3;c__JG37-AG-4;o__f__g__                                                                            | 0.1%  | 0.0%        | 0.0%        | 0.0%        | 0.4%        | 0.0%        | 0.0%        |
|        | k__Bacteria;p__Acidobacteria;Other;Other;Other;Other                                                                 | 0.0%  | 0.0%        | 0.0%        | 0.0%        | 0.0%        | 0.0%        | 0.0%        |
|        | k__Bacteria;p__Acidobacteria;c__o__f__g__                                                                            | 0.1%  | 0.0%        | 0.2%        | 0.1%        | 0.0%        | 0.5%        | 0.1%        |
|        | k__Bacteria;p__Acidobacteria;c__AT-s54;o__f__g__                                                                     | 0.0%  | 0.0%        | 0.0%        | 0.0%        | 0.0%        | 0.0%        | 0.0%        |
|        | k__Bacteria;p__Acidobacteria;c__Acidobacteria-5;o__f__g__                                                            | 0.4%  | 0.2%        | 0.3%        | 0.8%        | 0.0%        | 0.2%        | 0.7%        |
|        | k__Bacteria;p__Acidobacteria;c__Acidobacteria-6;Other;Other;Other                                                    | 0.0%  | 0.0%        | 0.0%        | 0.0%        | 0.0%        | 0.0%        | 0.0%        |
|        | k__Bacteria;p__Acidobacteria;c__Acidobacteria-6;o__BPC015;f__g__                                                     | 0.0%  | 0.0%        | 0.0%        | 0.0%        | 0.0%        | 0.0%        | 0.0%        |
|        | k__Bacteria;p__Acidobacteria;c__Acidobacteria-6;o__CCU21;f__g__                                                      | 0.1%  | 0.0%        | 0.1%        | 0.1%        | 0.0%        | 0.1%        | 0.1%        |
|        | k__Bacteria;p__Acidobacteria;c__Acidobacteria-6;o__iii1-15;Other;Other                                               | 0.0%  | 0.0%        | 0.0%        | 0.0%        | 0.0%        | 0.0%        | 0.0%        |
|        | k__Bacteria;p__Acidobacteria;c__Acidobacteria-6;o__iii1-15;f__g__                                                    | 3.1%  | 2.2%        | 3.3%        | 4.5%        | 0.1%        | 2.2%        | 5.9%        |
|        | k__Bacteria;p__Acidobacteria;c__Acidobacteria-6;o__iii1-15;f__RB40;g__                                               | 0.3%  | 0.4%        | 0.4%        | 0.5%        | 0.0%        | 0.1%        | 0.6%        |
|        | k__Bacteria;p__Acidobacteria;c__Acidobacteria-6;o__iii1-15;f__mb2424;g__                                             | 0.9%  | 1.0%        | 1.1%        | 0.7%        | 0.0%        | 1.5%        | 1.0%        |







|                                                                                                             |      |      |      |      |      |      |      |
|-------------------------------------------------------------------------------------------------------------|------|------|------|------|------|------|------|
| k_Bacteria;p_Armatimonadetes;c_SJA-176;o_RB046;f_g                                                          | 0.0% | 0.0% | 0.0% | 0.0% | 0.0% | 0.0% | 0.0% |
| k_Bacteria;p_Armatimonadetes;c_[Fimbrionadia];o_[Fimbrionadales];f_g                                        | 0.0% | 0.0% | 0.1% | 0.0% | 0.0% | 0.0% | 0.0% |
| k_Bacteria;p_Armatimonadetes;c_[Fimbrionadia];o_[Fimbrionadales];f_[Fimbrionadales];g                       | 0.1% | 0.0% | 0.3% | 0.0% | 0.0% | 0.0% | 0.0% |
| k_Bacteria;p_Armatimonadetes;c_[Fimbrionadia];o_[Fimbrionadales];f_[Fimbrionadales];g_Fimbrionas            | 0.1% | 0.0% | 0.3% | 0.1% | 0.0% | 0.0% | 0.0% |
| k_Bacteria;p_BHI80-139;c_o_f_g                                                                              | 0.0% | 0.0% | 0.0% | 0.0% | 0.0% | 0.0% | 0.0% |
| k_Bacteria;p_BRC1;c_NPL-UPA2;o_f_g                                                                          | 0.0% | 0.0% | 0.0% | 0.0% | 0.0% | 0.0% | 0.0% |
| k_Bacteria;p_BRC1;c_PRR-11;o_f_g                                                                            | 0.0% | 0.0% | 0.0% | 0.0% | 0.0% | 0.0% | 0.0% |
| k_Bacteria;p_Bacteroidetes;Other;Other;Other                                                                | 0.0% | 0.0% | 0.1% | 0.0% | 0.0% | 0.0% | 0.0% |
| k_Bacteria;p_Bacteroidetes;c_o_f_g                                                                          | 0.0% | 0.0% | 0.0% | 0.0% | 0.0% | 0.0% | 0.0% |
| k_Bacteria;p_Bacteroidetes;c_At12OctB3;o_f_g                                                                | 0.0% | 0.0% | 0.0% | 0.0% | 0.0% | 0.0% | 0.1% |
| k_Bacteria;p_Bacteroidetes;c_BME43;o_f_g                                                                    | 0.0% | 0.0% | 0.0% | 0.0% | 0.0% | 0.0% | 0.0% |
| k_Bacteria;p_Bacteroidetes;c_Bacteroidia;o_Bacteroidales;f_g                                                | 0.0% | 0.0% | 0.0% | 0.0% | 0.0% | 0.0% | 0.1% |
| k_Bacteria;p_Bacteroidetes;c_Bacteroidia;o_Bacteroidales;f_BA008;g                                          | 0.0% | 0.0% | 0.0% | 0.0% | 0.0% | 0.0% | 0.0% |
| k_Bacteria;p_Bacteroidetes;c_Bacteroidia;o_Bacteroidales;f_Rikenellaceae;g_Blvii28                          | 0.0% | 0.0% | 0.0% | 0.0% | 0.0% | 0.0% | 0.0% |
| k_Bacteria;p_Bacteroidetes;c_Bacteroidia;o_Bacteroidales;f_S24-7;g                                          | 0.0% | 0.0% | 0.0% | 0.0% | 0.0% | 0.0% | 0.0% |
| k_Bacteria;p_Bacteroidetes;c_Cytophagia;o_Cytophagales;Other;Other                                          | 0.0% | 0.0% | 0.0% | 0.0% | 0.0% | 0.0% | 0.0% |
| k_Bacteria;p_Bacteroidetes;c_Cytophagia;o_Cytophagales;f_g                                                  | 0.0% | 0.0% | 0.0% | 0.0% | 0.0% | 0.0% | 0.0% |
| k_Bacteria;p_Bacteroidetes;c_Cytophagia;o_Cytophagales;f_Cyclobacteriaceae;Other                            | 0.0% | 0.0% | 0.0% | 0.0% | 0.0% | 0.0% | 0.0% |
| k_Bacteria;p_Bacteroidetes;c_Cytophagia;o_Cytophagales;f_Cyclobacteriaceae;g                                | 0.0% | 0.0% | 0.0% | 0.0% | 0.0% | 0.0% | 0.0% |
| k_Bacteria;p_Bacteroidetes;c_Cytophagia;o_Cytophagales;f_Cyclobacteriaceae;g_Algoriphagus                   | 0.0% | 0.0% | 0.0% | 0.0% | 0.0% | 0.0% | 0.0% |
| k_Bacteria;p_Bacteroidetes;c_Cytophagia;o_Cytophagales;f_Cytophagaceae;g                                    | 0.8% | 2.7% | 0.5% | 1.4% | 0.0% | 0.0% | 0.3% |
| k_Bacteria;p_Bacteroidetes;c_Cytophagia;o_Cytophagales;f_Cytophagaceae;g_Adhaeribacter                      | 0.1% | 0.1% | 0.1% | 0.1% | 0.0% | 0.0% | 0.1% |
| k_Bacteria;p_Bacteroidetes;c_Cytophagia;o_Cytophagales;f_Cytophagaceae;g_Cytophaga                          | 0.0% | 0.0% | 0.0% | 0.0% | 0.0% | 0.0% | 0.0% |
| k_Bacteria;p_Bacteroidetes;c_Cytophagia;o_Cytophagales;f_Cytophagaceae;g_Dyadobacter                        | 0.0% | 0.0% | 0.0% | 0.0% | 0.0% | 0.0% | 0.0% |
| k_Bacteria;p_Bacteroidetes;c_Cytophagia;o_Cytophagales;f_Cytophagaceae;g_Enticicia                          | 0.0% | 0.0% | 0.0% | 0.0% | 0.0% | 0.0% | 0.0% |
| k_Bacteria;p_Bacteroidetes;c_Cytophagia;o_Cytophagales;f_Cytophagaceae;g_Flectobacillus                     | 0.0% | 0.0% | 0.0% | 0.0% | 0.0% | 0.0% | 0.0% |
| k_Bacteria;p_Bacteroidetes;c_Cytophagia;o_Cytophagales;f_Cytophagaceae;g_Hymenobacter                       | 0.0% | 0.0% | 0.0% | 0.1% | 0.0% | 0.0% | 0.0% |
| k_Bacteria;p_Bacteroidetes;c_Cytophagia;o_Cytophagales;f_Cytophagaceae;g_Larkinella                         | 0.0% | 0.0% | 0.0% | 0.0% | 0.0% | 0.0% | 0.0% |
| k_Bacteria;p_Bacteroidetes;c_Cytophagia;o_Cytophagales;f_Cytophagaceae;g_Leadbetterella                     | 0.0% | 0.0% | 0.0% | 0.0% | 0.0% | 0.0% | 0.0% |
| k_Bacteria;p_Bacteroidetes;c_Cytophagia;o_Cytophagales;f_Cytophagaceae;g_Pontibacter                        | 0.0% | 0.0% | 0.0% | 0.0% | 0.0% | 0.0% | 0.0% |
| k_Bacteria;p_Bacteroidetes;c_Cytophagia;o_Cytophagales;f_Cytophagaceae;g_Rhodocytophaga                     | 0.0% | 0.0% | 0.0% | 0.0% | 0.0% | 0.0% | 0.0% |
| k_Bacteria;p_Bacteroidetes;c_Cytophagia;o_Cytophagales;f_Cytophagaceae;g_Runella                            | 0.0% | 0.0% | 0.0% | 0.0% | 0.0% | 0.0% | 0.0% |
| k_Bacteria;p_Bacteroidetes;c_Cytophagia;o_Cytophagales;f_Cytophagaceae;g_Spirosoma                          | 0.0% | 0.0% | 0.0% | 0.0% | 0.0% | 0.0% | 0.0% |
| k_Bacteria;p_Bacteroidetes;c_Cytophagia;o_Cytophagales;f_Cytophagaceae;g_Sporocytophaga                     | 0.1% | 0.1% | 0.0% | 0.2% | 0.0% | 0.0% | 0.0% |
| k_Bacteria;p_Bacteroidetes;c_Cytophagia;o_Cytophagales;f_Flammeovirgaceae;g                                 | 0.0% | 0.0% | 0.0% | 0.0% | 0.0% | 0.0% | 0.0% |
| k_Bacteria;p_Bacteroidetes;c_Cytophagia;o_Cytophagales;f_Flammeovirgaceae;g_Fulvivirga                      | 0.0% | 0.0% | 0.0% | 0.0% | 0.0% | 0.0% | 0.0% |
| k_Bacteria;p_Bacteroidetes;c_Cytophagia;o_Cytophagales;f_Flammeovirgaceae;g_Roseivirga                      | 0.0% | 0.0% | 0.0% | 0.0% | 0.0% | 0.0% | 0.0% |
| k_Bacteria;p_Bacteroidetes;c_Cytophagia;o_Cytophagales;f_[Amoebofilaceae];g                                 | 0.0% | 0.0% | 0.0% | 0.0% | 0.0% | 0.0% | 0.0% |
| k_Bacteria;p_Bacteroidetes;c_Cytophagia;o_Cytophagales;f_[Amoebofilaceae];g_Candidatus Amoebophilus         | 0.0% | 0.0% | 0.0% | 0.0% | 0.0% | 0.0% | 0.0% |
| k_Bacteria;p_Bacteroidetes;c_Cytophagia;o_Cytophagales;f_[Amoebofilaceae];g_SC3-56                          | 0.0% | 0.0% | 0.0% | 0.0% | 0.0% | 0.0% | 0.0% |
| k_Bacteria;p_Bacteroidetes;c_Flavobacteriia;o_Flavobacteriales;Other;Other                                  | 0.0% | 0.0% | 0.0% | 0.0% | 0.0% | 0.0% | 0.0% |
| k_Bacteria;p_Bacteroidetes;c_Flavobacteriia;o_Flavobacteriales;f_g                                          | 0.0% | 0.0% | 0.0% | 0.0% | 0.0% | 0.0% | 0.0% |
| k_Bacteria;p_Bacteroidetes;c_Flavobacteriia;o_Flavobacteriales;f_Cryomorphaceae;g                           | 0.1% | 0.1% | 0.2% | 0.1% | 0.0% | 0.0% | 0.0% |
| k_Bacteria;p_Bacteroidetes;c_Flavobacteriia;o_Flavobacteriales;f_Cryomorphaceae;g_Crocinitomix              | 0.0% | 0.0% | 0.0% | 0.0% | 0.0% | 0.0% | 0.0% |
| k_Bacteria;p_Bacteroidetes;c_Flavobacteriia;o_Flavobacteriales;f_Cryomorphaceae;g_Fluviicola                | 0.0% | 0.0% | 0.1% | 0.0% | 0.0% | 0.1% | 0.0% |
| k_Bacteria;p_Bacteroidetes;c_Flavobacteriia;o_Flavobacteriales;f_Cryomorphaceae;g_Owenweeksia               | 0.0% | 0.0% | 0.0% | 0.0% | 0.0% | 0.0% | 0.0% |
| k_Bacteria;p_Bacteroidetes;c_Flavobacteriia;o_Flavobacteriales;f_Flavobacteriaceae;Other                    | 0.0% | 0.0% | 0.0% | 0.0% | 0.0% | 0.0% | 0.0% |
| k_Bacteria;p_Bacteroidetes;c_Flavobacteriia;o_Flavobacteriales;f_Flavobacteriaceae;g                        | 0.0% | 0.0% | 0.1% | 0.0% | 0.0% | 0.0% | 0.0% |
| k_Bacteria;p_Bacteroidetes;c_Flavobacteriia;o_Flavobacteriales;f_Flavobacteriaceae;g_Flavobacterium         | 0.8% | 1.2% | 0.7% | 2.5% | 0.0% | 0.1% | 0.2% |
| k_Bacteria;p_Bacteroidetes;c_Flavobacteriia;o_Flavobacteriales;f_Flavobacteriaceae;g_Gillisia               | 0.0% | 0.0% | 0.0% | 0.0% | 0.0% | 0.0% | 0.0% |
| k_Bacteria;p_Bacteroidetes;c_Flavobacteriia;o_Flavobacteriales;f_Flavobacteriaceae;g_Myroides               | 0.0% | 0.0% | 0.0% | 0.0% | 0.0% | 0.0% | 0.0% |
| k_Bacteria;p_Bacteroidetes;c_Flavobacteriia;o_Flavobacteriales;f_[Weeksellaceae];g_Chryseobacterium         | 0.0% | 0.0% | 0.0% | 0.0% | 0.0% | 0.0% | 0.0% |
| k_Bacteria;p_Bacteroidetes;c_Flavobacteriia;o_Flavobacteriales;f_[Weeksellaceae];g_Elizabethkingia          | 0.0% | 0.0% | 0.0% | 0.0% | 0.0% | 0.0% | 0.0% |
| k_Bacteria;p_Bacteroidetes;c_Sphingobacteriia;o_Sphingobacteriales;Other;Other                              | 0.0% | 0.0% | 0.0% | 0.0% | 0.0% | 0.0% | 0.0% |
| k_Bacteria;p_Bacteroidetes;c_Sphingobacteriia;o_Sphingobacteriales;f_g                                      | 1.8% | 0.8% | 3.0% | 4.2% | 0.3% | 1.7% | 0.7% |
| k_Bacteria;p_Bacteroidetes;c_Sphingobacteriia;o_Sphingobacteriales;f_Sphingobacteriaceae;Other              | 0.0% | 0.0% | 0.0% | 0.0% | 0.0% | 0.0% | 0.0% |
| k_Bacteria;p_Bacteroidetes;c_Sphingobacteriia;o_Sphingobacteriales;f_Sphingobacteriaceae;g                  | 0.4% | 0.2% | 0.8% | 0.3% | 0.3% | 0.5% | 0.2% |
| k_Bacteria;p_Bacteroidetes;c_Sphingobacteriia;o_Sphingobacteriales;f_Sphingobacteriaceae;g_Olivibacter      | 0.0% | 0.0% | 0.0% | 0.0% | 0.0% | 0.0% | 0.0% |
| k_Bacteria;p_Bacteroidetes;c_Sphingobacteriia;o_Sphingobacteriales;f_Sphingobacteriaceae;g_Pedobacter       | 0.1% | 0.0% | 0.4% | 0.1% | 0.0% | 0.0% | 0.0% |
| k_Bacteria;p_Bacteroidetes;c_Sphingobacteriia;o_Sphingobacteriales;f_Sphingobacteriaceae;g_Solitalea        | 0.0% | 0.0% | 0.0% | 0.0% | 0.0% | 0.0% | 0.0% |
| k_Bacteria;p_Bacteroidetes;c_Sphingobacteriia;o_Sphingobacteriales;f_Sphingobacteriaceae;g_Sphingobacterium | 0.0% | 0.0% | 0.0% | 0.0% | 0.0% | 0.0% | 0.0% |
| k_Bacteria;p_Bacteroidetes;c_VC2_1_Bac22;o_f_g                                                              | 0.0% | 0.0% | 0.0% | 0.0% | 0.0% | 0.0% | 0.0% |
| k_Bacteria;p_Bacteroidetes;c_[Rhodothermi];o_[Rhodothermales];f_Rhodothermaceae;g                           | 0.0% | 0.0% | 0.0% | 0.0% | 0.0% | 0.0% | 0.0% |
| k_Bacteria;p_Bacteroidetes;c_[Rhodothermi];o_[Rhodothermales];f_Rhodothermaceae;g_Rubricoccus               | 0.0% | 0.0% | 0.1% | 0.0% | 0.0% | 0.0% | 0.0% |
| k_Bacteria;p_Bacteroidetes;c_[Saprosirae];o_[Saprosirales];f_g                                              | 0.1% | 0.1% | 0.1% | 0.3% | 0.0% | 0.0% | 0.0% |
| k_Bacteria;p_Bacteroidetes;c_[Saprosirae];o_[Saprosirales];f_Chitinophagaceae;Other                         | 0.0% | 0.0% | 0.0% | 0.0% | 0.0% | 0.0% | 0.0% |
| k_Bacteria;p_Bacteroidetes;c_[Saprosirae];o_[Saprosirales];f_Chitinophagaceae;g                             | 2.6% | 1.7% | 3.4% | 5.9% | 1.0% | 1.3% | 2.3% |











|                                                                                                     |      |      |      |      |      |      |      |
|-----------------------------------------------------------------------------------------------------|------|------|------|------|------|------|------|
| k_Bacteria;p_Firmicutes;c_Bacilli;o_Bacillales:f_Sporolactobacillaceae;Other                        | 0.0% | 0.0% | 0.0% | 0.0% | 0.0% | 0.0% | 0.0% |
| k_Bacteria;p_Firmicutes;c_Bacilli;o_Bacillales:f_Sporolactobacillaceae:g_Sporolactobacillus         | 0.0% | 0.0% | 0.0% | 0.0% | 0.0% | 0.0% | 0.0% |
| k_Bacteria;p_Firmicutes;c_Bacilli;o_Bacillales:f_Staphylococcaceae:g_Staphylococcus                 | 0.0% | 0.0% | 0.0% | 0.0% | 0.0% | 0.0% | 0.0% |
| k_Bacteria;p_Firmicutes;c_Bacilli;o_Bacillales:f_Thermoactinomycetaceae;Other                       | 0.0% | 0.0% | 0.0% | 0.0% | 0.0% | 0.0% | 0.0% |
| k_Bacteria;p_Firmicutes;c_Bacilli;o_Bacillales:f_Thermoactinomycetaceae:g_                          | 0.0% | 0.0% | 0.0% | 0.0% | 0.0% | 0.0% | 0.0% |
| k_Bacteria;p_Firmicutes;c_Bacilli;o_Bacillales:f_Thermoactinomycetaceae:g_Planifilum                | 0.0% | 0.0% | 0.0% | 0.0% | 0.0% | 0.0% | 0.0% |
| k_Bacteria;p_Firmicutes;c_Bacilli;o_Bacillales:f_Thermoactinomycetaceae:g_Shimazuella               | 0.0% | 0.0% | 0.0% | 0.0% | 0.0% | 0.0% | 0.0% |
| k_Bacteria;p_Firmicutes;c_Bacilli;o_Bacillales:f_[Exiguobacteraceae];g_                             | 0.0% | 0.0% | 0.0% | 0.0% | 0.0% | 0.0% | 0.0% |
| k_Bacteria;p_Firmicutes;c_Bacilli;o_Bacillales:f_[Exiguobacteraceae];g_Exiguobacterium              | 0.0% | 0.0% | 0.0% | 0.0% | 0.0% | 0.0% | 0.0% |
| k_Bacteria;p_Firmicutes;c_Bacilli;o_Bacillales:f_[Thermicanaceae];g_Thermicanus                     | 0.0% | 0.0% | 0.0% | 0.0% | 0.0% | 0.0% | 0.0% |
| k_Bacteria;p_Firmicutes;c_Bacilli;o_Haloplasmatales:f_Haloplasmataceae:g_                           | 0.0% | 0.0% | 0.0% | 0.0% | 0.0% | 0.0% | 0.0% |
| k_Bacteria;p_Firmicutes;c_Bacilli;o_Lactobacillales:f_:g_                                           | 0.0% | 0.0% | 0.0% | 0.0% | 0.0% | 0.0% | 0.0% |
| k_Bacteria;p_Firmicutes;c_Bacilli;o_Lactobacillales:f_Aerococcaceae:g_Facklamia                     | 0.0% | 0.0% | 0.0% | 0.0% | 0.0% | 0.0% | 0.0% |
| k_Bacteria;p_Firmicutes;c_Bacilli;o_Lactobacillales:f_Carnobacteriaceae:g_Carnobacterium            | 0.0% | 0.0% | 0.0% | 0.0% | 0.0% | 0.0% | 0.0% |
| k_Bacteria;p_Firmicutes;c_Bacilli;o_Lactobacillales:f_Carnobacteriaceae:g_Deszemia                  | 0.0% | 0.0% | 0.0% | 0.0% | 0.0% | 0.0% | 0.0% |
| k_Bacteria;p_Firmicutes;c_Bacilli;o_Lactobacillales:f_Enterococcaceae:g_Enterococcus                | 0.0% | 0.0% | 0.0% | 0.0% | 0.0% | 0.0% | 0.0% |
| k_Bacteria;p_Firmicutes;c_Bacilli;o_Lactobacillales:f_Lactobacillaceae:g_Lactobacillus              | 0.0% | 0.0% | 0.0% | 0.0% | 0.0% | 0.0% | 0.0% |
| k_Bacteria;p_Firmicutes;c_Bacilli;o_Lactobacillales:f_Leuconostocaceae:g_Leuconostoc                | 0.0% | 0.0% | 0.0% | 0.0% | 0.0% | 0.0% | 0.0% |
| k_Bacteria;p_Firmicutes;c_Bacilli;o_Turicibacterales:f_Turicibacteraceae:g_Turicibacter             | 0.0% | 0.0% | 0.0% | 0.0% | 0.1% | 0.0% | 0.0% |
| k_Bacteria;p_Firmicutes;c_Clostridia;o_:f_:g_                                                       | 0.0% | 0.0% | 0.0% | 0.0% | 0.0% | 0.0% | 0.0% |
| k_Bacteria;p_Firmicutes;c_Clostridia;o_Clostridiales;Other;Other                                    | 0.0% | 0.0% | 0.0% | 0.0% | 0.0% | 0.0% | 0.0% |
| k_Bacteria;p_Firmicutes;c_Clostridia;o_Clostridiales:f_:g_                                          | 0.0% | 0.0% | 0.0% | 0.0% | 0.0% | 0.0% | 0.0% |
| k_Bacteria;p_Firmicutes;c_Clostridia;o_Clostridiales:f_Caldicoprobacteraceae:g_Caldicoprobacter     | 0.0% | 0.0% | 0.0% | 0.0% | 0.0% | 0.0% | 0.0% |
| k_Bacteria;p_Firmicutes;c_Clostridia;o_Clostridiales:f_Christensenellaceae:g_                       | 0.0% | 0.0% | 0.0% | 0.0% | 0.0% | 0.0% | 0.0% |
| k_Bacteria;p_Firmicutes;c_Clostridia;o_Clostridiales:f_Clostridiaceae;Other                         | 0.0% | 0.0% | 0.0% | 0.0% | 0.0% | 0.0% | 0.0% |
| k_Bacteria;p_Firmicutes;c_Clostridia;o_Clostridiales:f_Clostridiaceae:g_                            | 0.0% | 0.1% | 0.0% | 0.0% | 0.0% | 0.0% | 0.0% |
| k_Bacteria;p_Firmicutes;c_Clostridia;o_Clostridiales:f_Clostridiaceae:g_Alkaliphilus                | 0.0% | 0.0% | 0.0% | 0.0% | 0.0% | 0.0% | 0.0% |
| k_Bacteria;p_Firmicutes;c_Clostridia;o_Clostridiales:f_Clostridiaceae:g_Caloramator                 | 0.0% | 0.0% | 0.0% | 0.0% | 0.0% | 0.0% | 0.0% |
| k_Bacteria;p_Firmicutes;c_Clostridia;o_Clostridiales:f_Clostridiaceae:g_Candidatus Arthromitus      | 0.0% | 0.0% | 0.0% | 0.0% | 0.0% | 0.0% | 0.0% |
| k_Bacteria;p_Firmicutes;c_Clostridia;o_Clostridiales:f_Clostridiaceae:g_Clostridium                 | 0.1% | 0.1% | 0.1% | 0.1% | 0.0% | 0.1% | 0.3% |
| k_Bacteria;p_Firmicutes;c_Clostridia;o_Clostridiales:f_Clostridiaceae:g_Geosporobacter Thermotalea  | 0.0% | 0.0% | 0.0% | 0.0% | 0.0% | 0.0% | 0.0% |
| k_Bacteria;p_Firmicutes;c_Clostridia;o_Clostridiales:f_Clostridiaceae:g_Oxobacter                   | 0.0% | 0.0% | 0.0% | 0.0% | 0.0% | 0.0% | 0.0% |
| k_Bacteria;p_Firmicutes;c_Clostridia;o_Clostridiales:f_Clostridiaceae:g_SMB53                       | 0.0% | 0.0% | 0.0% | 0.0% | 0.0% | 0.0% | 0.0% |
| k_Bacteria;p_Firmicutes;c_Clostridia;o_Clostridiales:f_Clostridiaceae:g_Sarcina                     | 0.0% | 0.0% | 0.0% | 0.0% | 0.0% | 0.0% | 0.0% |
| k_Bacteria;p_Firmicutes;c_Clostridia;o_Clostridiales:f_Clostridiaceae:g_Thermoanaerobacterium       | 0.0% | 0.0% | 0.0% | 0.0% | 0.0% | 0.0% | 0.0% |
| k_Bacteria;p_Firmicutes;c_Clostridia;o_Clostridiales:f_Dehalobacteriaceae:g_                        | 0.0% | 0.0% | 0.0% | 0.0% | 0.0% | 0.0% | 0.0% |
| k_Bacteria;p_Firmicutes;c_Clostridia;o_Clostridiales:f_Dehalobacteriaceae:g_Dehalobacterium         | 0.0% | 0.0% | 0.0% | 0.0% | 0.1% | 0.0% | 0.0% |
| k_Bacteria;p_Firmicutes;c_Clostridia;o_Clostridiales:f_EtOH8;g_                                     | 0.0% | 0.0% | 0.0% | 0.0% | 0.0% | 0.0% | 0.0% |
| k_Bacteria;p_Firmicutes;c_Clostridia;o_Clostridiales:f_Eubacteriaceae:g_                            | 0.0% | 0.0% | 0.0% | 0.0% | 0.0% | 0.0% | 0.0% |
| k_Bacteria;p_Firmicutes;c_Clostridia;o_Clostridiales:f_Gracilibacteraceae:g_                        | 0.0% | 0.0% | 0.0% | 0.0% | 0.0% | 0.0% | 0.1% |
| k_Bacteria;p_Firmicutes;c_Clostridia;o_Clostridiales:f_Gracilibacteraceae:g_Gracilibacter           | 0.0% | 0.0% | 0.0% | 0.0% | 0.0% | 0.0% | 0.0% |
| k_Bacteria;p_Firmicutes;c_Clostridia;o_Clostridiales:f_Gracilibacteraceae:g_Lutispora               | 0.0% | 0.0% | 0.0% | 0.0% | 0.0% | 0.0% | 0.0% |
| k_Bacteria;p_Firmicutes;c_Clostridia;o_Clostridiales:f_Lachnospiraceae;Other                        | 0.0% | 0.0% | 0.0% | 0.0% | 0.0% | 0.0% | 0.0% |
| k_Bacteria;p_Firmicutes;c_Clostridia;o_Clostridiales:f_Lachnospiraceae:g_                           | 0.0% | 0.0% | 0.0% | 0.0% | 0.0% | 0.0% | 0.0% |
| k_Bacteria;p_Firmicutes;c_Clostridia;o_Clostridiales:f_Lachnospiraceae:g_Anaerostipes               | 0.0% | 0.0% | 0.0% | 0.0% | 0.0% | 0.0% | 0.0% |
| k_Bacteria;p_Firmicutes;c_Clostridia;o_Clostridiales:f_Lachnospiraceae:g_Blautia                    | 0.0% | 0.0% | 0.0% | 0.0% | 0.0% | 0.0% | 0.0% |
| k_Bacteria;p_Firmicutes;c_Clostridia;o_Clostridiales:f_Lachnospiraceae:g_Coprococcus                | 0.1% | 0.0% | 0.0% | 0.1% | 0.0% | 0.5% | 0.0% |
| k_Bacteria;p_Firmicutes;c_Clostridia;o_Clostridiales:f_Lachnospiraceae:g_Dorea                      | 0.0% | 0.0% | 0.0% | 0.0% | 0.0% | 0.0% | 0.0% |
| k_Bacteria;p_Firmicutes;c_Clostridia;o_Clostridiales:f_Lachnospiraceae:g_Epulpiscium                | 0.0% | 0.0% | 0.0% | 0.0% | 0.1% | 0.0% | 0.0% |
| k_Bacteria;p_Firmicutes;c_Clostridia;o_Clostridiales:f_Lachnospiraceae:g_Lachnospira                | 0.0% | 0.0% | 0.0% | 0.0% | 0.0% | 0.0% | 0.0% |
| k_Bacteria;p_Firmicutes;c_Clostridia;o_Clostridiales:f_Lachnospiraceae:g_Roseburia                  | 0.0% | 0.0% | 0.0% | 0.0% | 0.0% | 0.0% | 0.0% |
| k_Bacteria;p_Firmicutes;c_Clostridia;o_Clostridiales:f_Peptococcaceae;Other                         | 0.0% | 0.0% | 0.0% | 0.0% | 0.0% | 0.0% | 0.0% |
| k_Bacteria;p_Firmicutes;c_Clostridia;o_Clostridiales:f_Peptococcaceae:g_                            | 0.0% | 0.0% | 0.0% | 0.0% | 0.1% | 0.0% | 0.0% |
| k_Bacteria;p_Firmicutes;c_Clostridia;o_Clostridiales:f_Peptococcaceae:g_Dehalobacter Syntrophotulus | 0.0% | 0.0% | 0.0% | 0.0% | 0.0% | 0.0% | 0.0% |
| k_Bacteria;p_Firmicutes;c_Clostridia;o_Clostridiales:f_Peptococcaceae:g_Desulfonispora              | 0.0% | 0.0% | 0.0% | 0.0% | 0.0% | 0.0% | 0.0% |
| k_Bacteria;p_Firmicutes;c_Clostridia;o_Clostridiales:f_Peptococcaceae:g_Desulfosporosinus           | 0.0% | 0.0% | 0.0% | 0.0% | 0.1% | 0.0% | 0.0% |
| k_Bacteria;p_Firmicutes;c_Clostridia;o_Clostridiales:f_Peptococcaceae:g_Desulfotomaculum            | 0.0% | 0.0% | 0.0% | 0.0% | 0.0% | 0.0% | 0.0% |
| k_Bacteria;p_Firmicutes;c_Clostridia;o_Clostridiales:f_Peptococcaceae:g_Desulfurispora              | 0.0% | 0.0% | 0.0% | 0.0% | 0.0% | 0.0% | 0.0% |
| k_Bacteria;p_Firmicutes;c_Clostridia;o_Clostridiales:f_Peptococcaceae:g_Pelotomaculum               | 0.0% | 0.0% | 0.0% | 0.0% | 0.0% | 0.0% | 0.0% |
| k_Bacteria;p_Firmicutes;c_Clostridia;o_Clostridiales:f_Peptococcaceae:g_Sporotomaculum              | 0.0% | 0.0% | 0.0% | 0.0% | 0.0% | 0.0% | 0.0% |
| k_Bacteria;p_Firmicutes;c_Clostridia;o_Clostridiales:f_Peptococcaceae:g_WCHB1-84                    | 0.0% | 0.0% | 0.0% | 0.0% | 0.1% | 0.0% | 0.0% |
| k_Bacteria;p_Firmicutes;c_Clostridia;o_Clostridiales:f_Peptostreptococcaceae;Other                  | 0.0% | 0.1% | 0.0% | 0.1% | 0.0% | 0.0% | 0.1% |
| k_Bacteria;p_Firmicutes;c_Clostridia;o_Clostridiales:f_Peptostreptococcaceae:g_                     | 0.1% | 0.1% | 0.0% | 0.1% | 0.0% | 0.1% | 0.0% |
| k_Bacteria;p_Firmicutes;c_Clostridia;o_Clostridiales:f_Peptostreptococcaceae:g_Clostridium          | 0.0% | 0.0% | 0.0% | 0.0% | 0.0% | 0.0% | 0.0% |
| k_Bacteria;p_Firmicutes;c_Clostridia;o_Clostridiales:f_Peptostreptococcaceae:g_Tepidibacter         | 0.0% | 0.0% | 0.0% | 0.0% | 0.0% | 0.0% | 0.1% |
| k_Bacteria;p_Firmicutes;c_Clostridia;o_Clostridiales:f_Ruminococcaceae;Other                        | 0.0% | 0.0% | 0.0% | 0.0% | 0.0% | 0.0% | 0.0% |
| k_Bacteria;p_Firmicutes;c_Clostridia;o_Clostridiales:f_Ruminococcaceae:g_                           | 0.1% | 0.1% | 0.0% | 0.1% | 0.0% | 0.1% | 0.3% |

|                                                                                                            |      |      |      |      |      |      |      |
|------------------------------------------------------------------------------------------------------------|------|------|------|------|------|------|------|
| k_Bacteria;p_Firmicutes;c_Clostridia;o_Clostridiales;f_Ruminococaceae;g_Anaerotruncus                      | 0.0% | 0.0% | 0.0% | 0.0% | 0.0% | 0.0% | 0.0% |
| k_Bacteria;p_Firmicutes;c_Clostridia;o_Clostridiales;f_Ruminococaceae;g_Ethanolgenens                      | 0.0% | 0.0% | 0.0% | 0.0% | 0.0% | 0.0% | 0.0% |
| k_Bacteria;p_Firmicutes;c_Clostridia;o_Clostridiales;f_Ruminococaceae;g_Oscillospira                       | 0.0% | 0.0% | 0.0% | 0.0% | 0.0% | 0.0% | 0.0% |
| k_Bacteria;p_Firmicutes;c_Clostridia;o_Clostridiales;f_Ruminococaceae;g_Ruminococcus                       | 0.0% | 0.0% | 0.0% | 0.0% | 0.0% | 0.0% | 0.0% |
| k_Bacteria;p_Firmicutes;c_Clostridia;o_Clostridiales;f_Symbiobacteriaceae;g_Symbiobacterium                | 0.0% | 0.0% | 0.0% | 0.0% | 0.0% | 0.0% | 0.0% |
| k_Bacteria;p_Firmicutes;c_Clostridia;o_Clostridiales;f_Syntrophomonadaceae;g_Syntrophomonas                | 0.0% | 0.0% | 0.0% | 0.0% | 0.0% | 0.0% | 0.0% |
| k_Bacteria;p_Firmicutes;c_Clostridia;o_Clostridiales;f_Veillonellaceae;g_                                  | 0.0% | 0.0% | 0.0% | 0.0% | 0.0% | 0.0% | 0.0% |
| k_Bacteria;p_Firmicutes;c_Clostridia;o_Clostridiales;f_Veillonellaceae;g_BSV43                             | 0.0% | 0.0% | 0.0% | 0.0% | 0.0% | 0.0% | 0.0% |
| k_Bacteria;p_Firmicutes;c_Clostridia;o_Clostridiales;f_Veillonellaceae;g_G07                               | 0.0% | 0.0% | 0.0% | 0.0% | 0.0% | 0.0% | 0.0% |
| k_Bacteria;p_Firmicutes;c_Clostridia;o_Clostridiales;f_Veillonellaceae;g_Pelosinus                         | 0.0% | 0.0% | 0.0% | 0.0% | 0.0% | 0.0% | 0.0% |
| k_Bacteria;p_Firmicutes;c_Clostridia;o_Clostridiales;f_Veillonellaceae;g_Sporomusa                         | 0.0% | 0.0% | 0.0% | 0.0% | 0.0% | 0.0% | 0.0% |
| k_Bacteria;p_Firmicutes;c_Clostridia;o_Clostridiales;f_[Acidaminobacteraceae];g_Acidaminobacter            | 0.0% | 0.0% | 0.0% | 0.0% | 0.0% | 0.0% | 0.0% |
| k_Bacteria;p_Firmicutes;c_Clostridia;o_Clostridiales;f_[Acidaminobacteraceae];g_Fusibacter                 | 0.0% | 0.0% | 0.0% | 0.0% | 0.0% | 0.0% | 0.0% |
| k_Bacteria;p_Firmicutes;c_Clostridia;o_Clostridiales;f_[Mogibacteriaceae];Other                            | 0.0% | 0.0% | 0.0% | 0.0% | 0.0% | 0.0% | 0.0% |
| k_Bacteria;p_Firmicutes;c_Clostridia;o_Clostridiales;f_[Mogibacteriaceae];g_                               | 0.0% | 0.0% | 0.0% | 0.0% | 0.0% | 0.0% | 0.0% |
| k_Bacteria;p_Firmicutes;c_Clostridia;o_Clostridiales;f_[Mogibacteriaceae];g_Anaerovorax                    | 0.0% | 0.0% | 0.0% | 0.0% | 0.0% | 0.0% | 0.0% |
| k_Bacteria;p_Firmicutes;c_Clostridia;o_Clostridiales;f_[Tissierellaceae];g_                                | 0.0% | 0.0% | 0.0% | 0.0% | 0.0% | 0.0% | 0.0% |
| k_Bacteria;p_Firmicutes;c_Clostridia;o_Clostridiales;f_[Tissierellaceae];g_Sedimentibacter                 | 0.0% | 0.0% | 0.0% | 0.0% | 0.0% | 0.0% | 0.0% |
| k_Bacteria;p_Firmicutes;c_Clostridia;o_Clostridiales;f_[Tissierellaceae];g_Sporanaerobacter                | 0.0% | 0.0% | 0.0% | 0.0% | 0.0% | 0.0% | 0.0% |
| k_Bacteria;p_Firmicutes;c_Clostridia;o_Clostridiales;f_[Tissierellaceae];g_Tepidimicrobium                 | 0.0% | 0.0% | 0.0% | 0.0% | 0.0% | 0.0% | 0.0% |
| k_Bacteria;p_Firmicutes;c_Clostridia;o_Clostridiales;f_[Tissierellaceae];g_Tissierella Soehngenia          | 0.0% | 0.0% | 0.0% | 0.0% | 0.0% | 0.0% | 0.0% |
| k_Bacteria;p_Firmicutes;c_Clostridia;o_Halanaerobiales;f_g_                                                | 0.0% | 0.0% | 0.0% | 0.0% | 0.0% | 0.0% | 0.0% |
| k_Bacteria;p_Firmicutes;c_Clostridia;o_OPB54;f_g_                                                          | 0.0% | 0.0% | 0.0% | 0.0% | 0.0% | 0.0% | 0.1% |
| k_Bacteria;p_Firmicutes;c_Clostridia;o_SHA-98;f_D2;g_                                                      | 0.0% | 0.0% | 0.0% | 0.0% | 0.0% | 0.0% | 0.0% |
| k_Bacteria;p_Firmicutes;c_Clostridia;o_Thermoanaerobacterales;f_g_                                         | 0.0% | 0.0% | 0.0% | 0.0% | 0.0% | 0.0% | 0.0% |
| k_Bacteria;p_Firmicutes;c_Clostridia;o_Thermoanaerobacterales;f_Thermoanaerobacteraceae;g_Thermacetogenium | 0.0% | 0.0% | 0.0% | 0.0% | 0.0% | 0.0% | 0.0% |
| k_Bacteria;p_Firmicutes;c_Erysipelotrichi;o_Erysipelotrichales;f_Erysipelotrichaceae;g_                    | 0.0% | 0.0% | 0.0% | 0.0% | 0.0% | 0.0% | 0.0% |
| k_Bacteria;p_Firmicutes;c_Erysipelotrichi;o_Erysipelotrichales;f_Erysipelotrichaceae;g_PSB-M-3             | 0.0% | 0.0% | 0.0% | 0.0% | 0.0% | 0.0% | 0.0% |
| k_Bacteria;p_GAL15;c_o_f_g_                                                                                | 0.4% | 0.0% | 0.2% | 0.0% | 1.5% | 0.7% | 0.0% |
| k_Bacteria;p_GN02;c_o_f_g_                                                                                 | 0.0% | 0.0% | 0.0% | 0.0% | 0.0% | 0.0% | 0.0% |
| k_Bacteria;p_GN02;c_3BR-5F;o_f_g_                                                                          | 0.0% | 0.0% | 0.0% | 0.0% | 0.0% | 0.0% | 0.0% |
| k_Bacteria;p_GN02;c_BB34;o_f_g_                                                                            | 0.0% | 0.0% | 0.0% | 0.0% | 0.0% | 0.0% | 0.0% |
| k_Bacteria;p_GN02;c_BD1-5;o_f_g_                                                                           | 0.0% | 0.0% | 0.0% | 0.0% | 0.0% | 0.0% | 0.0% |
| k_Bacteria;p_GN02;c_GKS2-174;o_f_g_                                                                        | 0.0% | 0.0% | 0.1% | 0.0% | 0.0% | 0.0% | 0.0% |
| k_Bacteria;p_GN02;c_GN07;o_f_g_                                                                            | 0.0% | 0.0% | 0.0% | 0.0% | 0.1% | 0.0% | 0.0% |
| k_Bacteria;p_GN04;c_o_f_g_                                                                                 | 0.0% | 0.0% | 0.2% | 0.0% | 0.0% | 0.0% | 0.0% |
| k_Bacteria;p_GN04;c_GN15;o_f_g_                                                                            | 0.0% | 0.0% | 0.1% | 0.0% | 0.0% | 0.0% | 0.0% |
| k_Bacteria;p_GN04;c_MSB-5A5;o_f_g_                                                                         | 0.0% | 0.0% | 0.0% | 0.0% | 0.0% | 0.0% | 0.0% |
| k_Bacteria;p_Gemmatimonadetes;c_o_f_g_                                                                     | 0.3% | 0.0% | 0.7% | 0.0% | 0.0% | 0.7% | 0.2% |
| k_Bacteria;p_Gemmatimonadetes;c_Gemm-1;o_f_g_                                                              | 0.7% | 0.7% | 0.8% | 0.6% | 0.2% | 1.6% | 0.5% |
| k_Bacteria;p_Gemmatimonadetes;c_Gemm-2;o_f_g_                                                              | 0.1% | 0.2% | 0.1% | 0.0% | 0.0% | 0.0% | 0.1% |
| k_Bacteria;p_Gemmatimonadetes;c_Gemm-3;o_f_g_                                                              | 0.1% | 0.5% | 0.1% | 0.0% | 0.0% | 0.0% | 0.0% |
| k_Bacteria;p_Gemmatimonadetes;c_Gemm-4;o_f_g_                                                              | 0.0% | 0.0% | 0.0% | 0.0% | 0.0% | 0.0% | 0.0% |
| k_Bacteria;p_Gemmatimonadetes;c_Gemm-5;o_f_g_                                                              | 0.2% | 0.4% | 0.3% | 0.0% | 0.0% | 0.1% | 0.3% |
| k_Bacteria;p_Gemmatimonadetes;c_Gemmatimonadetes;Other;Other;Other                                         | 0.0% | 0.0% | 0.0% | 0.0% | 0.0% | 0.0% | 0.0% |
| k_Bacteria;p_Gemmatimonadetes;c_Gemmatimonadetes;o_f_g_                                                    | 0.3% | 0.1% | 1.0% | 0.1% | 0.1% | 0.6% | 0.2% |
| k_Bacteria;p_Gemmatimonadetes;c_Gemmatimonadetes;o_C114;f_g_                                               | 0.2% | 0.0% | 0.5% | 0.0% | 0.0% | 0.6% | 0.0% |
| k_Bacteria;p_Gemmatimonadetes;c_Gemmatimonadetes;o_Ellin5290;f_g_                                          | 0.0% | 0.1% | 0.0% | 0.1% | 0.0% | 0.0% | 0.0% |
| k_Bacteria;p_Gemmatimonadetes;c_Gemmatimonadetes;o_Gemmatimonadales;Other;Other                            | 0.0% | 0.0% | 0.0% | 0.0% | 0.0% | 0.0% | 0.0% |
| k_Bacteria;p_Gemmatimonadetes;c_Gemmatimonadetes;o_Gemmatimonadales;f_g_                                   | 0.0% | 0.0% | 0.0% | 0.0% | 0.0% | 0.0% | 0.0% |
| k_Bacteria;p_Gemmatimonadetes;c_Gemmatimonadetes;o_Gemmatimonadales;f_Ellin5301;g_                         | 0.0% | 0.0% | 0.0% | 0.1% | 0.0% | 0.0% | 0.0% |
| k_Bacteria;p_Gemmatimonadetes;c_Gemmatimonadetes;o_Gemmatimonadales;f_Gemmatimonadaceae;g_Gemmatimonas     | 0.1% | 0.0% | 0.3% | 0.1% | 0.0% | 0.1% | 0.0% |
| k_Bacteria;p_Gemmatimonadetes;c_Gemmatimonadetes;o_KD8-87;f_g_                                             | 0.0% | 0.1% | 0.1% | 0.0% | 0.0% | 0.0% | 0.0% |
| k_Bacteria;p_Gemmatimonadetes;c_Gemmatimonadetes;o_N1423WL;f_g_                                            | 0.3% | 0.0% | 1.8% | 0.0% | 0.0% | 0.3% | 0.0% |
| k_Bacteria;p_Kazan-3B-28;c_o_f_g_                                                                          | 0.0% | 0.0% | 0.0% | 0.0% | 0.0% | 0.0% | 0.0% |
| k_Bacteria;p_Lentisphaerae;c_[Lentisphaeria];o_Lentisphaerales;f_Arctic95B-10;g_                           | 0.0% | 0.0% | 0.0% | 0.0% | 0.0% | 0.0% | 0.0% |
| k_Bacteria;p_Lentisphaerae;c_[Lentisphaeria];o_Victivallales;f_Victivallaceae;g_                           | 0.0% | 0.0% | 0.0% | 0.0% | 0.0% | 0.0% | 0.0% |
| k_Bacteria;p_MVP-21;c_o_f_g_                                                                               | 0.0% | 0.0% | 0.0% | 0.0% | 0.0% | 0.0% | 0.0% |
| k_Bacteria;p_NC10;c_12-24;Other;Other;Other                                                                | 0.0% | 0.0% | 0.0% | 0.0% | 0.0% | 0.0% | 0.0% |
| k_Bacteria;p_NC10;c_12-24;o_JH-WHS47;f_g_                                                                  | 0.0% | 0.0% | 0.0% | 0.0% | 0.0% | 0.0% | 0.1% |
| k_Bacteria;p_NC10;c_12-24;o_Methylomirabiales;f_Methylomirabiliaceae;g_Candidatus Methylomirabilis         | 0.0% | 0.0% | 0.0% | 0.0% | 0.0% | 0.0% | 0.0% |
| k_Bacteria;p_NC10;c_wb1-A12;o_f_g_                                                                         | 0.0% | 0.0% | 0.0% | 0.0% | 0.0% | 0.0% | 0.0% |
| k_Bacteria;p_NKB19;Other;Other;Other;Other                                                                 | 0.0% | 0.0% | 0.0% | 0.0% | 0.0% | 0.0% | 0.0% |
| k_Bacteria;p_NKB19;c_o_f_g_                                                                                | 0.0% | 0.0% | 0.1% | 0.0% | 0.0% | 0.0% | 0.0% |
| k_Bacteria;p_NKB19;c_TSBW08;o_f_g_                                                                         | 0.0% | 0.0% | 0.0% | 0.0% | 0.0% | 0.0% | 0.0% |
| k_Bacteria;p_Nitrospirae;c_Nitrospira;o_Nitrospirales;f_g_                                                 | 0.0% | 0.0% | 0.0% | 0.0% | 0.0% | 0.0% | 0.1% |
| k_Bacteria;p_Nitrospirae;c_Nitrospira;o_Nitrospirales;f_0319-6A21;g_                                       | 0.6% | 0.1% | 0.5% | 0.7% | 0.3% | 1.1% | 1.1% |

|                                                                                                         |      |      |      |      |      |      |      |
|---------------------------------------------------------------------------------------------------------|------|------|------|------|------|------|------|
| k_Bacteria;p__Nitrospirae;c__Nitrospira;o__Nitrospirales;f__FW;g_4-29                                   | 0.0% | 0.0% | 0.0% | 0.0% | 0.0% | 0.0% | 0.2% |
| k_Bacteria;p__Nitrospirae;c__Nitrospira;o__Nitrospirales;f__Nitrospiraceae;Other                        | 0.0% | 0.0% | 0.0% | 0.0% | 0.0% | 0.0% | 0.0% |
| k_Bacteria;p__Nitrospirae;c__Nitrospira;o__Nitrospirales;f__Nitrospiraceae;g__                          | 1.6% | 0.0% | 3.1% | 0.1% | 4.6% | 2.0% | 0.0% |
| k_Bacteria;p__Nitrospirae;c__Nitrospira;o__Nitrospirales;f__Nitrospiraceae;g_JG37-AG-70                 | 0.0% | 0.0% | 0.0% | 0.0% | 0.0% | 0.0% | 0.0% |
| k_Bacteria;p__Nitrospirae;c__Nitrospira;o__Nitrospirales;f__Nitrospiraceae;g_Nitrospira                 | 3.6% | 0.8% | 6.0% | 1.5% | 9.5% | 2.0% | 2.0% |
| k_Bacteria;p__Nitrospirae;c__Nitrospira;o__Nitrospirales;f__[Leptospirillaceae];g__                     | 0.0% | 0.0% | 0.0% | 0.0% | 0.0% | 0.0% | 0.0% |
| k_Bacteria;p__Nitrospirae;c__Nitrospira;o__Nitrospirales;f__[Thermodesulfobionaceae];g__                | 0.0% | 0.0% | 0.0% | 0.0% | 0.0% | 0.0% | 0.1% |
| k_Bacteria;p__Nitrospirae;c__Nitrospira;o__Nitrospirales;f__[Thermodesulfobionaceae];g_GOUTA19          | 0.0% | 0.0% | 0.0% | 0.0% | 0.0% | 0.0% | 0.1% |
| k_Bacteria;p__Nitrospirae;c__Nitrospira;o__Nitrospirales;f__[Thermodesulfobionaceae];g_HB118            | 0.0% | 0.0% | 0.0% | 0.0% | 0.0% | 0.0% | 0.0% |
| k_Bacteria;p__OD1;c__o__f__g__                                                                          | 0.0% | 0.1% | 0.1% | 0.0% | 0.0% | 0.0% | 0.0% |
| k_Bacteria;p__OD1;c__ABY1;o__f__g__                                                                     | 0.1% | 0.0% | 0.0% | 0.0% | 0.2% | 0.1% | 0.0% |
| k_Bacteria;p__OD1;c__Mb-NB09;o__f__g__                                                                  | 0.0% | 0.0% | 0.0% | 0.0% | 0.0% | 0.0% | 0.0% |
| k_Bacteria;p__OD1;c__SM2F11;o__f__g__                                                                   | 0.2% | 0.1% | 0.2% | 0.1% | 0.2% | 0.1% | 0.2% |
| k_Bacteria;p__OD1;c__ZB2;o__f__g__                                                                      | 0.1% | 0.1% | 0.1% | 0.0% | 0.0% | 0.0% | 0.0% |
| k_Bacteria;p__OP1;c__[Acetothermia];o__[Acetothermales];f__g__                                          | 0.0% | 0.0% | 0.0% | 0.0% | 0.0% | 0.0% | 0.0% |
| k_Bacteria;p__OP11;c__o__f__g__                                                                         | 0.0% | 0.0% | 0.0% | 0.0% | 0.0% | 0.0% | 0.0% |
| k_Bacteria;p__OP11;c__OP11-3;o__f__g__                                                                  | 0.0% | 0.0% | 0.0% | 0.0% | 0.0% | 0.0% | 0.0% |
| k_Bacteria;p__OP11;c__OP11-4;o__f__g__                                                                  | 0.0% | 0.0% | 0.0% | 0.0% | 0.1% | 0.0% | 0.0% |
| k_Bacteria;p__OP11;c__WCHB1-64;o__f__g__                                                                | 0.0% | 0.0% | 0.0% | 0.0% | 0.0% | 0.0% | 0.0% |
| k_Bacteria;p__OP11;c__WCHB1-64;o__K2-4-19;f__g__                                                        | 0.0% | 0.0% | 0.0% | 0.0% | 0.0% | 0.0% | 0.0% |
| k_Bacteria;p__OP11;c__WCHB1-64;o__d153;f__g__                                                           | 0.0% | 0.0% | 0.0% | 0.0% | 0.0% | 0.0% | 0.0% |
| k_Bacteria;p__OP3;c__o__f__g__                                                                          | 0.0% | 0.0% | 0.0% | 0.0% | 0.0% | 0.0% | 0.0% |
| k_Bacteria;p__OP3;c__PBS-25;o__f__g__                                                                   | 0.0% | 0.0% | 0.0% | 0.0% | 0.0% | 0.0% | 0.0% |
| k_Bacteria;p__OP3;c__kol11;o__f__g__                                                                    | 0.0% | 0.0% | 0.1% | 0.0% | 0.0% | 0.1% | 0.0% |
| k_Bacteria;p__OP3;c__kol11;o__GIF10;f__g__                                                              | 0.0% | 0.0% | 0.0% | 0.0% | 0.0% | 0.0% | 0.0% |
| k_Bacteria;p__OP3;c__kol11;o__GIF10;f__kpj58rc;g__                                                      | 0.0% | 0.0% | 0.0% | 0.0% | 0.0% | 0.0% | 0.0% |
| k_Bacteria;p__Planctomycetes;c__o__f__g__                                                               | 0.0% | 0.0% | 0.0% | 0.0% | 0.0% | 0.0% | 0.0% |
| k_Bacteria;p__Planctomycetes;c__028H05-P-BN-P5;o__f__g__                                                | 0.0% | 0.0% | 0.0% | 0.0% | 0.0% | 0.0% | 0.0% |
| k_Bacteria;p__Planctomycetes;c__BD7-11;o__f__g__                                                        | 0.0% | 0.0% | 0.1% | 0.0% | 0.0% | 0.1% | 0.0% |
| k_Bacteria;p__Planctomycetes;c__C6;o__MVS-107;f__g__                                                    | 0.0% | 0.0% | 0.0% | 0.0% | 0.0% | 0.0% | 0.0% |
| k_Bacteria;p__Planctomycetes;c__C6;o__Ucm1571;f__g__                                                    | 0.0% | 0.0% | 0.0% | 0.0% | 0.0% | 0.0% | 0.0% |
| k_Bacteria;p__Planctomycetes;c__C6;o__d113;f__g__                                                       | 0.0% | 0.0% | 0.0% | 0.0% | 0.0% | 0.0% | 0.0% |
| k_Bacteria;p__Planctomycetes;c__ODP123;o__T8-B82;f__g__                                                 | 0.0% | 0.0% | 0.0% | 0.0% | 0.0% | 0.0% | 0.0% |
| k_Bacteria;p__Planctomycetes;c__OM190;o__f__g__                                                         | 0.0% | 0.0% | 0.0% | 0.0% | 0.0% | 0.0% | 0.0% |
| k_Bacteria;p__Planctomycetes;c__OM190;o__CL500-15;f__g__                                                | 0.0% | 0.1% | 0.0% | 0.0% | 0.0% | 0.0% | 0.0% |
| k_Bacteria;p__Planctomycetes;c__OM190;o__agg27;f__g__                                                   | 0.1% | 0.1% | 0.1% | 0.1% | 0.0% | 0.1% | 0.1% |
| k_Bacteria;p__Planctomycetes;c__Phycisphaerae;o__AKAU3564;f__g__                                        | 0.0% | 0.0% | 0.0% | 0.0% | 0.0% | 0.0% | 0.0% |
| k_Bacteria;p__Planctomycetes;c__Phycisphaerae;o__CCM11a;f__g__                                          | 0.0% | 0.0% | 0.2% | 0.0% | 0.0% | 0.0% | 0.0% |
| k_Bacteria;p__Planctomycetes;c__Phycisphaerae;o__Phycisphaerales;f__g__                                 | 0.3% | 0.4% | 0.3% | 0.4% | 0.0% | 0.3% | 0.2% |
| k_Bacteria;p__Planctomycetes;c__Phycisphaerae;o__Phycisphaerales;f__Phycisphaeraeae;g__                 | 0.0% | 0.0% | 0.0% | 0.0% | 0.0% | 0.0% | 0.0% |
| k_Bacteria;p__Planctomycetes;c__Phycisphaerae;o__Pla1;f__g__                                            | 0.0% | 0.0% | 0.0% | 0.0% | 0.0% | 0.0% | 0.0% |
| k_Bacteria;p__Planctomycetes;c__Phycisphaerae;o__S-70;f__g__                                            | 0.0% | 0.0% | 0.0% | 0.0% | 0.0% | 0.0% | 0.0% |
| k_Bacteria;p__Planctomycetes;c__Phycisphaerae;o__WD2101;f__g__                                          | 0.0% | 0.0% | 0.0% | 0.0% | 0.0% | 0.0% | 0.0% |
| k_Bacteria;p__Planctomycetes;c__Phycisphaerae;o__mle1-8;f__g__                                          | 0.0% | 0.0% | 0.0% | 0.0% | 0.0% | 0.0% | 0.0% |
| k_Bacteria;p__Planctomycetes;c__Pla3;o__f__g__                                                          | 0.0% | 0.0% | 0.0% | 0.0% | 0.0% | 0.1% | 0.0% |
| k_Bacteria;p__Planctomycetes;c__Pla4;o__f__g__                                                          | 0.0% | 0.0% | 0.0% | 0.0% | 0.0% | 0.0% | 0.0% |
| k_Bacteria;p__Planctomycetes;c__Planctomycetia;o__f__g__                                                | 0.0% | 0.0% | 0.0% | 0.0% | 0.0% | 0.0% | 0.0% |
| k_Bacteria;p__Planctomycetes;c__Planctomycetia;o__B97;f__g__                                            | 0.0% | 0.0% | 0.0% | 0.1% | 0.0% | 0.0% | 0.0% |
| k_Bacteria;p__Planctomycetes;c__Planctomycetia;o__Gemmatales;f__Gemmataceae;Other                       | 0.0% | 0.0% | 0.0% | 0.0% | 0.0% | 0.0% | 0.0% |
| k_Bacteria;p__Planctomycetes;c__Planctomycetia;o__Gemmatales;f__Gemmataceae;g__                         | 1.0% | 0.2% | 0.6% | 0.9% | 2.8% | 0.7% | 0.8% |
| k_Bacteria;p__Planctomycetes;c__Planctomycetia;o__Gemmatales;f__Gemmataceae;g_Gemmata                   | 0.1% | 0.1% | 0.1% | 0.2% | 0.0% | 0.0% | 0.1% |
| k_Bacteria;p__Planctomycetes;c__Planctomycetia;o__Gemmatales;f__Isosphaeraeae;g__                       | 0.0% | 0.0% | 0.0% | 0.1% | 0.0% | 0.0% | 0.0% |
| k_Bacteria;p__Planctomycetes;c__Planctomycetia;o__Gemmatales;f__Isosphaeraeae;g_Isosphaera              | 0.0% | 0.0% | 0.0% | 0.0% | 0.0% | 0.0% | 0.0% |
| k_Bacteria;p__Planctomycetes;c__Planctomycetia;o__Pirellulales;f__Pirellulaceae;Other                   | 0.0% | 0.0% | 0.0% | 0.0% | 0.0% | 0.0% | 0.0% |
| k_Bacteria;p__Planctomycetes;c__Planctomycetia;o__Pirellulales;f__Pirellulaceae;g__                     | 0.1% | 0.2% | 0.1% | 0.2% | 0.0% | 0.1% | 0.2% |
| k_Bacteria;p__Planctomycetes;c__Planctomycetia;o__Pirellulales;f__Pirellulaceae;g_A17                   | 0.0% | 0.0% | 0.0% | 0.0% | 0.0% | 0.0% | 0.0% |
| k_Bacteria;p__Planctomycetes;c__Planctomycetia;o__Pirellulales;f__Pirellulaceae;g_Pirellula             | 0.0% | 0.0% | 0.0% | 0.1% | 0.0% | 0.0% | 0.1% |
| k_Bacteria;p__Planctomycetes;c__Planctomycetia;o__Planctomycetiales;f__Planctomycetaceae;g_Planctomyces | 0.0% | 0.1% | 0.0% | 0.1% | 0.0% | 0.0% | 0.0% |
| k_Bacteria;p__Planctomycetes;c__[Brocadia];o__Brocadiales;f__Brocadiaceae;g_Candidatus Brocadia         | 0.0% | 0.0% | 0.0% | 0.0% | 0.0% | 0.0% | 0.0% |
| k_Bacteria;p__Planctomycetes;c__vadinHA49;o__DH61;f__g__                                                | 0.0% | 0.0% | 0.0% | 0.0% | 0.0% | 0.0% | 0.0% |
| k_Bacteria;p__Planctomycetes;c__vadinHA49;o__PHOS-HE93;f__g__                                           | 0.0% | 0.0% | 0.0% | 0.0% | 0.0% | 0.0% | 0.0% |
| k_Bacteria;p__Planctomycetes;c__vadinHA49;o__p04_C01;f__g__                                             | 0.0% | 0.0% | 0.0% | 0.0% | 0.0% | 0.0% | 0.0% |
| k_Bacteria;p__Proteobacteria;Other;Other;Other;Other                                                    | 0.0% | 0.0% | 0.0% | 0.0% | 0.0% | 0.0% | 0.0% |
| k_Bacteria;p__Proteobacteria;c__o__f__g__                                                               | 0.0% | 0.0% | 0.0% | 0.0% | 0.0% | 0.0% | 0.0% |
| k_Bacteria;p__Proteobacteria;c__Alphaproteobacteria;Other;Other;Other                                   | 0.0% | 0.0% | 0.0% | 0.0% | 0.0% | 0.0% | 0.0% |
| k_Bacteria;p__Proteobacteria;c__Alphaproteobacteria;o__f__g__                                           | 0.4% | 1.1% | 0.5% | 0.4% | 0.0% | 0.1% | 0.0% |
| k_Bacteria;p__Proteobacteria;c__Alphaproteobacteria;o__BD7-3;f__g__                                     | 0.1% | 0.2% | 0.1% | 0.1% | 0.0% | 0.0% | 0.0% |











|                                                                                                                              |      |      |      |      |      |      |      |
|------------------------------------------------------------------------------------------------------------------------------|------|------|------|------|------|------|------|
| k_Bacteria;p__Proteobacteria;c__Deltaproteobacteria;o__MBNT15;f__g__                                                         | 0.0% | 0.0% | 0.0% | 0.0% | 0.0% | 0.0% | 0.1% |
| k_Bacteria;p__Proteobacteria;c__Deltaproteobacteria;o__MIZ46;f__g__                                                          | 0.1% | 0.0% | 0.1% | 0.2% | 0.0% | 0.1% | 0.1% |
| k_Bacteria;p__Proteobacteria;c__Deltaproteobacteria;o__Myxococcales;Other;Other                                              | 0.0% | 0.0% | 0.0% | 0.0% | 0.0% | 0.0% | 0.0% |
| k_Bacteria;p__Proteobacteria;c__Deltaproteobacteria;o__Myxococcales;f__g__                                                   | 1.0% | 2.1% | 0.7% | 1.3% | 0.3% | 0.5% | 1.0% |
| k_Bacteria;p__Proteobacteria;c__Deltaproteobacteria;o__Myxococcales;f__0319-6G20;g__                                         | 0.0% | 0.0% | 0.0% | 0.0% | 0.0% | 0.0% | 0.0% |
| k_Bacteria;p__Proteobacteria;c__Deltaproteobacteria;o__Myxococcales;f__Cystobacterineae;g__                                  | 0.0% | 0.0% | 0.0% | 0.0% | 0.0% | 0.0% | 0.0% |
| k_Bacteria;p__Proteobacteria;c__Deltaproteobacteria;o__Myxococcales;f__Haliangiaceae;Other                                   | 0.0% | 0.0% | 0.0% | 0.0% | 0.0% | 0.0% | 0.0% |
| k_Bacteria;p__Proteobacteria;c__Deltaproteobacteria;o__Myxococcales;f__Haliangiaceae;g__                                     | 0.2% | 0.3% | 0.2% | 0.1% | 0.0% | 0.1% | 0.2% |
| k_Bacteria;p__Proteobacteria;c__Deltaproteobacteria;o__Myxococcales;f__Haliangiaceae;g__Haliangium                           | 0.0% | 0.0% | 0.0% | 0.0% | 0.0% | 0.0% | 0.0% |
| k_Bacteria;p__Proteobacteria;c__Deltaproteobacteria;o__Myxococcales;f__Myxococcaceae;Other                                   | 0.0% | 0.0% | 0.0% | 0.0% | 0.0% | 0.0% | 0.0% |
| k_Bacteria;p__Proteobacteria;c__Deltaproteobacteria;o__Myxococcales;f__Myxococcaceae;g__                                     | 0.0% | 0.0% | 0.0% | 0.0% | 0.0% | 0.0% | 0.0% |
| k_Bacteria;p__Proteobacteria;c__Deltaproteobacteria;o__Myxococcales;f__Myxococcaceae;g__Anaeromyxobacter                     | 0.0% | 0.0% | 0.0% | 0.0% | 0.0% | 0.0% | 0.1% |
| k_Bacteria;p__Proteobacteria;c__Deltaproteobacteria;o__Myxococcales;f__Myxococcaceae;g__Myxococcus                           | 0.0% | 0.0% | 0.0% | 0.0% | 0.0% | 0.0% | 0.0% |
| k_Bacteria;p__Proteobacteria;c__Deltaproteobacteria;o__Myxococcales;f__Nannocystaceae;g__Nannocystis                         | 0.0% | 0.0% | 0.0% | 0.0% | 0.0% | 0.0% | 0.0% |
| k_Bacteria;p__Proteobacteria;c__Deltaproteobacteria;o__Myxococcales;f__Nannocystaceae;g__Plesiocystis                        | 0.0% | 0.1% | 0.0% | 0.0% | 0.0% | 0.0% | 0.0% |
| k_Bacteria;p__Proteobacteria;c__Deltaproteobacteria;o__Myxococcales;f__OM27;g__                                              | 0.1% | 0.2% | 0.1% | 0.1% | 0.0% | 0.1% | 0.0% |
| k_Bacteria;p__Proteobacteria;c__Deltaproteobacteria;o__Myxococcales;f__Polyangiaceae;Other                                   | 0.0% | 0.0% | 0.0% | 0.0% | 0.0% | 0.0% | 0.0% |
| k_Bacteria;p__Proteobacteria;c__Deltaproteobacteria;o__Myxococcales;f__Polyangiaceae;g__                                     | 0.0% | 0.0% | 0.0% | 0.0% | 0.0% | 0.0% | 0.0% |
| k_Bacteria;p__Proteobacteria;c__Deltaproteobacteria;o__Myxococcales;f__Polyangiaceae;g__Chondromyces                         | 0.0% | 0.0% | 0.0% | 0.0% | 0.0% | 0.0% | 0.0% |
| k_Bacteria;p__Proteobacteria;c__Deltaproteobacteria;o__NB1-j;f__g__                                                          | 0.1% | 0.0% | 0.1% | 0.1% | 0.0% | 0.1% | 0.1% |
| k_Bacteria;p__Proteobacteria;c__Deltaproteobacteria;o__NB1-j;f__JTB38;g__                                                    | 0.0% | 0.0% | 0.0% | 0.0% | 0.0% | 0.0% | 0.0% |
| k_Bacteria;p__Proteobacteria;c__Deltaproteobacteria;o__NB1-j;f__MND4;g__                                                     | 0.0% | 0.0% | 0.0% | 0.0% | 0.0% | 0.0% | 0.0% |
| k_Bacteria;p__Proteobacteria;c__Deltaproteobacteria;o__NB1-j;f__NB1-i;g__                                                    | 0.1% | 0.0% | 0.0% | 0.1% | 0.0% | 0.1% | 0.1% |
| k_Bacteria;p__Proteobacteria;c__Deltaproteobacteria;o__NBK15;f__g__                                                          | 0.0% | 0.0% | 0.0% | 0.0% | 0.0% | 0.0% | 0.0% |
| k_Bacteria;p__Proteobacteria;c__Deltaproteobacteria;o__PB19;f__g__                                                           | 0.0% | 0.0% | 0.0% | 0.0% | 0.0% | 0.0% | 0.0% |
| k_Bacteria;p__Proteobacteria;c__Deltaproteobacteria;o__Spirobacillales;f__g__                                                | 0.1% | 0.1% | 0.1% | 0.1% | 0.0% | 0.0% | 0.0% |
| k_Bacteria;p__Proteobacteria;c__Deltaproteobacteria;o__Sva0853;f__JTB36;g__                                                  | 0.0% | 0.0% | 0.0% | 0.0% | 0.0% | 0.0% | 0.0% |
| k_Bacteria;p__Proteobacteria;c__Deltaproteobacteria;o__Syntrophobacteriales;f__Syntrophaceae;g__                             | 0.0% | 0.0% | 0.0% | 0.0% | 0.0% | 0.0% | 0.0% |
| k_Bacteria;p__Proteobacteria;c__Deltaproteobacteria;o__Syntrophobacteriales;f__Syntrophaceae;g__Desulfobacca                 | 0.0% | 0.0% | 0.0% | 0.0% | 0.0% | 0.0% | 0.0% |
| k_Bacteria;p__Proteobacteria;c__Deltaproteobacteria;o__Syntrophobacteriales;f__Syntrophaceae;g__Smithella                    | 0.0% | 0.0% | 0.0% | 0.0% | 0.0% | 0.0% | 0.0% |
| k_Bacteria;p__Proteobacteria;c__Deltaproteobacteria;o__Syntrophobacteriales;f__Syntrophobacteraceae;Other                    | 0.0% | 0.0% | 0.0% | 0.0% | 0.0% | 0.0% | 0.0% |
| k_Bacteria;p__Proteobacteria;c__Deltaproteobacteria;o__Syntrophobacteriales;f__Syntrophobacteraceae;g__                      | 1.5% | 1.1% | 1.0% | 1.4% | 1.4% | 1.2% | 2.9% |
| k_Bacteria;p__Proteobacteria;c__Deltaproteobacteria;o__Syntrophobacteriales;f__Syntrophobacteraceae;g__Syntrophobacter       | 0.0% | 0.0% | 0.0% | 0.0% | 0.0% | 0.0% | 0.1% |
| k_Bacteria;p__Proteobacteria;c__Deltaproteobacteria;o__Syntrophobacteriales;f__Syntrophorhabdaceae;g__                       | 0.0% | 0.0% | 0.0% | 0.0% | 0.0% | 0.0% | 0.0% |
| k_Bacteria;p__Proteobacteria;c__Deltaproteobacteria;o__[Entotheonellales];f__g__                                             | 0.0% | 0.0% | 0.0% | 0.0% | 0.0% | 0.0% | 0.0% |
| k_Bacteria;p__Proteobacteria;c__Deltaproteobacteria;o__[Entotheonellales];f__[Entotheonellaceae];g__                         | 0.3% | 0.1% | 0.1% | 0.3% | 0.0% | 0.1% | 1.0% |
| k_Bacteria;p__Proteobacteria;c__Deltaproteobacteria;o__[Entotheonellales];f__[Entotheonellaceae];g__Candidatus Entotheonella | 0.1% | 0.4% | 0.0% | 0.0% | 0.0% | 0.0% | 0.0% |
| k_Bacteria;p__Proteobacteria;c__Epsilonproteobacteria;o__Campylobacteriales;f__Helicobacteraceae;g__Sulfuricurvum            | 0.0% | 0.0% | 0.0% | 0.0% | 0.0% | 0.0% | 0.0% |
| k_Bacteria;p__Proteobacteria;c__Gammaproteobacteria;Other;Other;Other                                                        | 0.0% | 0.0% | 0.0% | 0.0% | 0.0% | 0.0% | 0.0% |
| k_Bacteria;p__Proteobacteria;c__Gammaproteobacteria;o__f__g__                                                                | 0.1% | 0.0% | 0.0% | 0.1% | 0.3% | 0.0% | 0.0% |
| k_Bacteria;p__Proteobacteria;c__Gammaproteobacteria;o__34P16;f__g__                                                          | 0.0% | 0.0% | 0.0% | 0.0% | 0.0% | 0.0% | 0.0% |
| k_Bacteria;p__Proteobacteria;c__Gammaproteobacteria;o__Acidithiobacillales;f__g__                                            | 0.0% | 0.0% | 0.0% | 0.0% | 0.0% | 0.0% | 0.0% |
| k_Bacteria;p__Proteobacteria;c__Gammaproteobacteria;o__Aeromonadales;f__Aeromonadaceae;g__                                   | 0.0% | 0.0% | 0.0% | 0.0% | 0.0% | 0.0% | 0.0% |
| k_Bacteria;p__Proteobacteria;c__Gammaproteobacteria;o__Alteromonadales;Other;Other                                           | 0.0% | 0.1% | 0.0% | 0.1% | 0.0% | 0.0% | 0.0% |
| k_Bacteria;p__Proteobacteria;c__Gammaproteobacteria;o__Alteromonadales;f__g__                                                | 0.0% | 0.0% | 0.0% | 0.0% | 0.0% | 0.0% | 0.0% |
| k_Bacteria;p__Proteobacteria;c__Gammaproteobacteria;o__Alteromonadales;f__125ds10;g__                                        | 0.0% | 0.0% | 0.0% | 0.0% | 0.0% | 0.0% | 0.0% |
| k_Bacteria;p__Proteobacteria;c__Gammaproteobacteria;o__Alteromonadales;f__211ds20;g__                                        | 0.0% | 0.2% | 0.0% | 0.0% | 0.0% | 0.0% | 0.0% |
| k_Bacteria;p__Proteobacteria;c__Gammaproteobacteria;o__Alteromonadales;f__Alteromonadaceae;Other                             | 0.0% | 0.0% | 0.0% | 0.0% | 0.0% | 0.0% | 0.0% |
| k_Bacteria;p__Proteobacteria;c__Gammaproteobacteria;o__Alteromonadales;f__Alteromonadaceae;g__                               | 0.0% | 0.0% | 0.0% | 0.0% | 0.0% | 0.0% | 0.0% |
| k_Bacteria;p__Proteobacteria;c__Gammaproteobacteria;o__Alteromonadales;f__Alteromonadaceae;g__Cellvibrio                     | 0.0% | 0.0% | 0.0% | 0.0% | 0.0% | 0.0% | 0.0% |
| k_Bacteria;p__Proteobacteria;c__Gammaproteobacteria;o__Alteromonadales;f__Alteromonadaceae;g__Marinobacter                   | 0.0% | 0.0% | 0.0% | 0.0% | 0.0% | 0.0% | 0.0% |
| k_Bacteria;p__Proteobacteria;c__Gammaproteobacteria;o__Alteromonadales;f__HTCC2188;g__HTCC                                   | 0.0% | 0.0% | 0.0% | 0.0% | 0.0% | 0.0% | 0.0% |
| k_Bacteria;p__Proteobacteria;c__Gammaproteobacteria;o__Alteromonadales;f__OM60;g__                                           | 0.0% | 0.1% | 0.0% | 0.2% | 0.0% | 0.0% | 0.0% |
| k_Bacteria;p__Proteobacteria;c__Gammaproteobacteria;o__Alteromonadales;f__[Chromatiaceae];g__Rheinheimera                    | 0.0% | 0.0% | 0.0% | 0.0% | 0.0% | 0.0% | 0.0% |
| k_Bacteria;p__Proteobacteria;c__Gammaproteobacteria;o__Chromatiales;Other;Other                                              | 0.0% | 0.0% | 0.0% | 0.0% | 0.0% | 0.0% | 0.0% |
| k_Bacteria;p__Proteobacteria;c__Gammaproteobacteria;o__Chromatiales;f__g__                                                   | 1.0% | 0.1% | 0.2% | 0.0% | 0.0% | 5.7% | 0.2% |
| k_Bacteria;p__Proteobacteria;c__Gammaproteobacteria;o__Chromatiales;f__Chromatiaceae;Other                                   | 0.0% | 0.0% | 0.0% | 0.0% | 0.0% | 0.0% | 0.0% |
| k_Bacteria;p__Proteobacteria;c__Gammaproteobacteria;o__Chromatiales;f__Chromatiaceae;g__                                     | 0.0% | 0.0% | 0.0% | 0.0% | 0.0% | 0.0% | 0.0% |
| k_Bacteria;p__Proteobacteria;c__Gammaproteobacteria;o__Chromatiales;f__Chromatiaceae;g__Nitrosococcus                        | 0.0% | 0.0% | 0.0% | 0.0% | 0.0% | 0.0% | 0.0% |
| k_Bacteria;p__Proteobacteria;c__Gammaproteobacteria;o__Chromatiales;f__Ectothiorhodospiraceae;g__                            | 0.0% | 0.0% | 0.0% | 0.0% | 0.0% | 0.0% | 0.0% |
| k_Bacteria;p__Proteobacteria;c__Gammaproteobacteria;o__Chromatiales;f__Ectothiorhodospiraceae;g__Halorhodospira              | 0.0% | 0.0% | 0.0% | 0.0% | 0.0% | 0.0% | 0.0% |
| k_Bacteria;p__Proteobacteria;c__Gammaproteobacteria;o__Chromatiales;f__Ectothiorhodospiraceae;g__Natronocella                | 0.0% | 0.0% | 0.0% | 0.0% | 0.0% | 0.0% | 0.0% |
| k_Bacteria;p__Proteobacteria;c__Gammaproteobacteria;o__Enterobacteriales;f__Enterobacteriaceae;Other                         | 0.0% | 0.0% | 0.0% | 0.0% | 0.0% | 0.0% | 0.0% |
| k_Bacteria;p__Proteobacteria;c__Gammaproteobacteria;o__Enterobacteriales;f__Enterobacteriaceae;g__                           | 0.0% | 0.0% | 0.0% | 0.0% | 0.0% | 0.0% | 0.0% |
| k_Bacteria;p__Proteobacteria;c__Gammaproteobacteria;o__Enterobacteriales;f__Enterobacteriaceae;g__Providencia                | 0.0% | 0.0% | 0.0% | 0.0% | 0.0% | 0.0% | 0.0% |
| k_Bacteria;p__Proteobacteria;c__Gammaproteobacteria;o__HOC36;f__g__                                                          | 0.0% | 0.0% | 0.0% | 0.0% | 0.0% | 0.0% | 0.1% |
| k_Bacteria;p__Proteobacteria;c__Gammaproteobacteria;o__HTCC2188;f__HTCC2089;g__                                              | 0.1% | 0.1% | 0.0% | 0.3% | 0.0% | 0.0% | 0.1% |

|                                                                                                                 |      |      |      |      |      |      |      |
|-----------------------------------------------------------------------------------------------------------------|------|------|------|------|------|------|------|
| k_Bacteria;p__Proteobacteria;c__Gammaproteobacteria;o__Legionellales;Other;Other                                | 0.0% | 0.0% | 0.0% | 0.0% | 0.0% | 0.0% | 0.0% |
| k_Bacteria;p__Proteobacteria;c__Gammaproteobacteria;o__Legionellales;f__g__                                     | 0.1% | 0.0% | 0.1% | 0.1% | 0.1% | 0.0% | 0.0% |
| k_Bacteria;p__Proteobacteria;c__Gammaproteobacteria;o__Legionellales;f__Coxiellaceae;Other                      | 0.0% | 0.0% | 0.0% | 0.0% | 0.0% | 0.0% | 0.0% |
| k_Bacteria;p__Proteobacteria;c__Gammaproteobacteria;o__Legionellales;f__Coxiellaceae;g__                        | 0.2% | 0.2% | 0.1% | 0.3% | 0.4% | 0.2% | 0.1% |
| k_Bacteria;p__Proteobacteria;c__Gammaproteobacteria;o__Legionellales;f__Coxiellaceae;g__Aquicella               | 0.1% | 0.0% | 0.0% | 0.1% | 0.5% | 0.0% | 0.0% |
| k_Bacteria;p__Proteobacteria;c__Gammaproteobacteria;o__Legionellales;f__Coxiellaceae;g__Coxiella                | 0.0% | 0.0% | 0.0% | 0.0% | 0.0% | 0.0% | 0.0% |
| k_Bacteria;p__Proteobacteria;c__Gammaproteobacteria;o__Legionellales;f__Coxiellaceae;g__Rickettsiella           | 0.0% | 0.0% | 0.0% | 0.0% | 0.0% | 0.0% | 0.0% |
| k_Bacteria;p__Proteobacteria;c__Gammaproteobacteria;o__Legionellales;f__Legionellaceae;Other                    | 0.0% | 0.0% | 0.0% | 0.0% | 0.0% | 0.0% | 0.0% |
| k_Bacteria;p__Proteobacteria;c__Gammaproteobacteria;o__Legionellales;f__Legionellaceae;g__                      | 0.0% | 0.1% | 0.0% | 0.1% | 0.0% | 0.0% | 0.0% |
| k_Bacteria;p__Proteobacteria;c__Gammaproteobacteria;o__Legionellales;f__Legionellaceae;g__Legionella            | 0.0% | 0.0% | 0.0% | 0.1% | 0.0% | 0.0% | 0.0% |
| k_Bacteria;p__Proteobacteria;c__Gammaproteobacteria;o__Legionellales;f__Legionellaceae;g__Tatlockia             | 0.0% | 0.0% | 0.0% | 0.0% | 0.0% | 0.0% | 0.0% |
| k_Bacteria;p__Proteobacteria;c__Gammaproteobacteria;o__Methylococcales;f__Crenotrichaceae;g__Crenothrix         | 0.0% | 0.0% | 0.0% | 0.0% | 0.0% | 0.0% | 0.0% |
| k_Bacteria;p__Proteobacteria;c__Gammaproteobacteria;o__Methylococcales;f__Methylococcaceae;Other                | 0.0% | 0.0% | 0.0% | 0.0% | 0.0% | 0.0% | 0.1% |
| k_Bacteria;p__Proteobacteria;c__Gammaproteobacteria;o__Methylococcales;f__Methylococcaceae;g__                  | 0.0% | 0.0% | 0.0% | 0.0% | 0.0% | 0.0% | 0.1% |
| k_Bacteria;p__Proteobacteria;c__Gammaproteobacteria;o__Methylococcales;f__Methylococcaceae;g__Methylcaldum      | 0.0% | 0.0% | 0.0% | 0.0% | 0.0% | 0.0% | 0.0% |
| k_Bacteria;p__Proteobacteria;c__Gammaproteobacteria;o__Methylococcales;f__Methylococcaceae;g__Methylomonas      | 0.0% | 0.0% | 0.0% | 0.0% | 0.0% | 0.0% | 0.0% |
| k_Bacteria;p__Proteobacteria;c__Gammaproteobacteria;o__Methylococcales;f__Methylococcaceae;g__Methylsarcina     | 0.0% | 0.0% | 0.0% | 0.0% | 0.0% | 0.0% | 0.0% |
| k_Bacteria;p__Proteobacteria;c__Gammaproteobacteria;o__Oceanospirillales;f__Halomonadaceae;g__                  | 0.0% | 0.0% | 0.0% | 0.0% | 0.0% | 0.0% | 0.0% |
| k_Bacteria;p__Proteobacteria;c__Gammaproteobacteria;o__Oceanospirillales;f__Halomonadaceae;g__Halomonas         | 0.0% | 0.0% | 0.0% | 0.0% | 0.0% | 0.0% | 0.0% |
| k_Bacteria;p__Proteobacteria;c__Gammaproteobacteria;o__Oceanospirillales;f__Oceanospirillaceae;g__              | 0.0% | 0.0% | 0.0% | 0.0% | 0.0% | 0.0% | 0.0% |
| k_Bacteria;p__Proteobacteria;c__Gammaproteobacteria;o__Oceanospirillales;f__Oleiphilaceae;g__                   | 0.0% | 0.0% | 0.0% | 0.0% | 0.0% | 0.0% | 0.0% |
| k_Bacteria;p__Proteobacteria;c__Gammaproteobacteria;o__PYR10d3;f__g__                                           | 0.0% | 0.0% | 0.0% | 0.0% | 0.0% | 0.0% | 0.0% |
| k_Bacteria;p__Proteobacteria;c__Gammaproteobacteria;o__Pseudomonadales;Other;Other                              | 0.0% | 0.0% | 0.0% | 0.0% | 0.0% | 0.0% | 0.0% |
| k_Bacteria;p__Proteobacteria;c__Gammaproteobacteria;o__Pseudomonadales;f__Moraxellaceae;Other                   | 0.0% | 0.0% | 0.0% | 0.0% | 0.0% | 0.0% | 0.0% |
| k_Bacteria;p__Proteobacteria;c__Gammaproteobacteria;o__Pseudomonadales;f__Moraxellaceae;g__                     | 0.1% | 0.0% | 0.0% | 0.0% | 0.6% | 0.0% | 0.0% |
| k_Bacteria;p__Proteobacteria;c__Gammaproteobacteria;o__Pseudomonadales;f__Moraxellaceae;g__Acinetobacter        | 0.0% | 0.0% | 0.0% | 0.0% | 0.0% | 0.0% | 0.0% |
| k_Bacteria;p__Proteobacteria;c__Gammaproteobacteria;o__Pseudomonadales;f__Moraxellaceae;g__Perucidibaca         | 0.0% | 0.0% | 0.1% | 0.0% | 0.0% | 0.0% | 0.0% |
| k_Bacteria;p__Proteobacteria;c__Gammaproteobacteria;o__Pseudomonadales;f__Pseudomonadaceae;Other                | 0.0% | 0.0% | 0.0% | 0.0% | 0.0% | 0.0% | 0.0% |
| k_Bacteria;p__Proteobacteria;c__Gammaproteobacteria;o__Pseudomonadales;f__Pseudomonadaceae;g__                  | 0.0% | 0.0% | 0.0% | 0.0% | 0.0% | 0.0% | 0.0% |
| k_Bacteria;p__Proteobacteria;c__Gammaproteobacteria;o__Pseudomonadales;f__Pseudomonadaceae;g__Pseudomonas       | 0.1% | 0.2% | 0.1% | 0.2% | 0.3% | 0.1% | 0.0% |
| k_Bacteria;p__Proteobacteria;c__Gammaproteobacteria;o__Thiotrichales;f__Piscirickettsiaceae;g__                 | 0.6% | 2.3% | 0.2% | 0.6% | 0.0% | 0.1% | 0.4% |
| k_Bacteria;p__Proteobacteria;c__Gammaproteobacteria;o__Xanthomonadales;f__Sinobacteraceae;g__                   | 1.2% | 1.6% | 0.6% | 1.5% | 1.4% | 1.1% | 0.8% |
| k_Bacteria;p__Proteobacteria;c__Gammaproteobacteria;o__Xanthomonadales;f__Sinobacteraceae;g__Nevskia            | 0.0% | 0.0% | 0.0% | 0.0% | 0.0% | 0.0% | 0.0% |
| k_Bacteria;p__Proteobacteria;c__Gammaproteobacteria;o__Xanthomonadales;f__Sinobacteraceae;g__Steriodibacter     | 0.3% | 0.8% | 0.4% | 0.3% | 0.0% | 0.1% | 0.4% |
| k_Bacteria;p__Proteobacteria;c__Gammaproteobacteria;o__Xanthomonadales;f__Xanthomonadaceae;Other                | 0.1% | 0.1% | 0.6% | 0.0% | 0.0% | 0.0% | 0.0% |
| k_Bacteria;p__Proteobacteria;c__Gammaproteobacteria;o__Xanthomonadales;f__Xanthomonadaceae;g__                  | 0.3% | 0.8% | 0.5% | 0.5% | 0.2% | 0.1% | 0.0% |
| k_Bacteria;p__Proteobacteria;c__Gammaproteobacteria;o__Xanthomonadales;f__Xanthomonadaceae;g__Arenimonas        | 0.0% | 0.1% | 0.0% | 0.0% | 0.0% | 0.0% | 0.0% |
| k_Bacteria;p__Proteobacteria;c__Gammaproteobacteria;o__Xanthomonadales;f__Xanthomonadaceae;g__Dokdonella        | 0.0% | 0.0% | 0.0% | 0.0% | 0.0% | 0.0% | 0.0% |
| k_Bacteria;p__Proteobacteria;c__Gammaproteobacteria;o__Xanthomonadales;f__Xanthomonadaceae;g__Luteibacter       | 0.0% | 0.0% | 0.0% | 0.0% | 0.0% | 0.0% | 0.0% |
| k_Bacteria;p__Proteobacteria;c__Gammaproteobacteria;o__Xanthomonadales;f__Xanthomonadaceae;g__Luteimonas        | 0.0% | 0.0% | 0.1% | 0.0% | 0.0% | 0.0% | 0.0% |
| k_Bacteria;p__Proteobacteria;c__Gammaproteobacteria;o__Xanthomonadales;f__Xanthomonadaceae;g__Lysobacter        | 0.1% | 0.1% | 0.3% | 0.0% | 0.0% | 0.0% | 0.0% |
| k_Bacteria;p__Proteobacteria;c__Gammaproteobacteria;o__Xanthomonadales;f__Xanthomonadaceae;g__Pseudoxanthomonas | 0.0% | 0.0% | 0.0% | 0.0% | 0.0% | 0.0% | 0.0% |
| k_Bacteria;p__Proteobacteria;c__Gammaproteobacteria;o__Xanthomonadales;f__Xanthomonadaceae;g__Rhodanobacter     | 0.1% | 0.0% | 0.0% | 0.1% | 0.5% | 0.0% | 0.0% |
| k_Bacteria;p__Proteobacteria;c__Gammaproteobacteria;o__Xanthomonadales;f__Xanthomonadaceae;g__Stenotrophomonas  | 0.0% | 0.0% | 0.0% | 0.0% | 0.0% | 0.0% | 0.0% |
| k_Bacteria;p__Proteobacteria;c__Gammaproteobacteria;o__Xanthomonadales;f__Xanthomonadaceae;g__Thermomonas       | 0.0% | 0.0% | 0.0% | 0.0% | 0.0% | 0.0% | 0.0% |
| k_Bacteria;p__Proteobacteria;c__Gammaproteobacteria;o__[Marinicellales];f__[Marinicellaceae];g__                | 0.0% | 0.0% | 0.0% | 0.0% | 0.0% | 0.0% | 0.0% |
| k_Bacteria;p__Proteobacteria;c__TA18;o__CV90;f__g__                                                             | 0.0% | 0.0% | 0.0% | 0.0% | 0.0% | 0.0% | 0.0% |
| k_Bacteria;p__Proteobacteria;c__TA18;o__PHOS-HD29;f__g__                                                        | 0.0% | 0.0% | 0.0% | 0.1% | 0.0% | 0.0% | 0.0% |
| k_Bacteria;p__SBR1093;c__o__f__g__                                                                              | 0.0% | 0.0% | 0.0% | 0.0% | 0.0% | 0.2% | 0.0% |
| k_Bacteria;p__SBR1093;c__VHS-B5-50;o__f__g__                                                                    | 0.0% | 0.0% | 0.0% | 0.0% | 0.0% | 0.0% | 0.0% |
| k_Bacteria;p__SC4;c__o__f__g__                                                                                  | 0.0% | 0.0% | 0.0% | 0.0% | 0.0% | 0.0% | 0.0% |
| k_Bacteria;p__SR1;c__o__f__g__                                                                                  | 0.0% | 0.0% | 0.0% | 0.0% | 0.0% | 0.0% | 0.0% |
| k_Bacteria;p__Spirochaetes;c__GN05;o__f__g__                                                                    | 0.0% | 0.0% | 0.0% | 0.0% | 0.0% | 0.0% | 0.0% |
| k_Bacteria;p__Spirochaetes;c__[Leptospirae];o__[Leptospirales];f__Leptospiraceae;g__Leptonema                   | 0.0% | 0.0% | 0.0% | 0.0% | 0.0% | 0.0% | 0.0% |
| k_Bacteria;p__Spirochaetes;c__[Leptospirae];o__[Leptospirales];f__Leptospiraceae;g__Leptospira                  | 0.0% | 0.0% | 0.0% | 0.0% | 0.0% | 0.0% | 0.0% |
| k_Bacteria;p__Spirochaetes;c__[Leptospirae];o__[Leptospirales];f__Leptospiraceae;g__Turneriella                 | 0.0% | 0.0% | 0.0% | 0.0% | 0.0% | 0.0% | 0.0% |
| k_Bacteria;p__TM6;c__SBRH58;o__f__g__                                                                           | 0.0% | 0.0% | 0.0% | 0.0% | 0.0% | 0.0% | 0.0% |
| k_Bacteria;p__TM6;c__SJA-4;Other;Other;Other                                                                    | 0.0% | 0.0% | 0.0% | 0.0% | 0.0% | 0.0% | 0.0% |
| k_Bacteria;p__TM6;c__SJA-4;o__f__g__                                                                            | 0.1% | 0.2% | 0.1% | 0.1% | 0.1% | 0.1% | 0.2% |
| k_Bacteria;p__TM6;c__SJA-4;o__S1198;f__g__                                                                      | 0.0% | 0.0% | 0.0% | 0.0% | 0.0% | 0.0% | 0.0% |
| k_Bacteria;p__TM6;c__SJA-4;o__YJF2-48;f__g__                                                                    | 0.0% | 0.0% | 0.0% | 0.0% | 0.0% | 0.0% | 0.0% |
| k_Bacteria;p__TM7;Other;Other;Other;Other                                                                       | 0.0% | 0.0% | 0.0% | 0.0% | 0.0% | 0.0% | 0.0% |
| k_Bacteria;p__TM7;c__o__f__g__                                                                                  | 0.0% | 0.0% | 0.0% | 0.0% | 0.0% | 0.0% | 0.0% |
| k_Bacteria;p__TM7;c__MJK10;o__f__g__                                                                            | 0.0% | 0.0% | 0.0% | 0.0% | 0.0% | 0.0% | 0.0% |
| k_Bacteria;p__TM7;c__SC3;o__f__g__                                                                              | 0.0% | 0.0% | 0.0% | 0.0% | 0.0% | 0.0% | 0.0% |
| k_Bacteria;p__TM7;c__TM7-1;o__f__g__                                                                            | 0.4% | 0.5% | 0.4% | 0.5% | 0.1% | 0.3% | 0.4% |
| k_Bacteria;p__TM7;c__TM7-3;Other;Other;Other                                                                    | 0.0% | 0.0% | 0.0% | 0.0% | 0.1% | 0.0% | 0.0% |
